# Supplementary material
Source: Research Square preprint supplement (doi:10.21203/rs.3.rs-9704769/v1)
Supplement: Supplementary file 1 [file 40121d82cf4a703897418d89.docx]

**Tables**

Table 1: Demographics of Participants

|  | Category | Frequency | Percentage |
| --- | --- | --- | --- |
| Gender | Male | 14 | 47% |
| Female | 16 | 53% |
| Age | 18-25 | 3 | 10% |
| 26-30 | 4 | 13% |
| 31-40 | 12 | 40% |
| 41-50 | 6 | 20% |
| Above 50 | 5 | 17% |
| Monthly income (in yuan) | 5000 below | 9 | 30% |
| 5000-10000 | 7 | 24% |
| 10000 above -15000 | 6 | 20% |
| 15000 above | 8 | 26% |
| Education | High school and below | 7 | 24% |
| Associate degree | 10 | 33% |
| Bachelor | 9 | 30% |
| Masters and above | 4 | 13% |
| Use intention | Yes | 17 | 57% |
| No | 13 | 43% |

Table 2: Thematic Categories and Basic-level Concepts

| Category | Basic-level concept | Interview excerpt |
| --- | --- | --- |
| Cost-benefit assessment | Cost-benefit assessment | “I would ask myself like what are the pos and cons of using e-CNY? What is its value? You need to download it and also spend time learning how to use it, quite burdensome. So if there aren’t too much benefits, I won’t use it.”[[1]](#footnote-1)(Interviewee #5) |
| Trade-off between convenience and management costs | “Actually, I have also considered trying it out. Using e-CNY should indeed be more convenient, but for me, having multiple digital wallets means an increase in management costs.” (Interviewee #6) |
| Trade-off between benefits and learning costs | “If there are no greater benefits associated with using e-CNY, and yet you still need to learn how to use it, then it becomes a hassle.” (Interviewee #14) |
| Relative advantage | Next-level of convenience | “It (PBOC) can be used offline, meaning it can still be used even without internet access, not like Alipay and WeChat Pay. It should be more convenient to use...you just need to bring the phones close together for direct payment. This level of convenience is even higher.” (Interviewee #2) |
| Faster payment | “It (PBOC) streamlines the payment process...so it should be faster with less steps in the process. Its backend flows swiftly, which means my payments are quicker.” (Interviewee #15) |
| Usage cost | Time and effort | “I imagine using it (PBOC) might be similar to using WeChat Pay or Alipay, but understanding it definitely isn’t simple...high tech stuff is always complex...the more complex the thing is, the more time it takes to learn...I don’t want to expend this effort and time.” (Interviewee #3) |
| Set-up cost | “Installing an app feels troublesome to me...you have to install it, then manage the program, create an account, set up passwords, fill out background information, and so on.” (Interviewee #16) |
| Habit of using third-party payment platforms | Habitually using WeChat Pay/Alipay | “If you’ve been using it (WeChat Pay/Alipay) for a long time, it’s difficult to break that habit. Moreover, imagine if a store offers both e-CNY payment and WeChat Pay/Alipay, which one would you choose? You’d instinctively pull out the WeChat Pay/Alipay QR code, right?” (Interviewee #5) |
| Proficiently using WeChat Pay/Alipay | “After using WeChat Pay and Alipay for a long time, I got so proficient in using them that I could simply take out my phone and make the payment immediately, without needing to fumble around on the phone.” (Interviewee #12) |
| Patriotic sentiment | Patriotism | “It’s patriotism, and it’s also a social trend. Upholding currency sovereignty is a collective effort. If someone has such patriotic sentiments, they are also willing to accept e-CNY even if it causes some inconveniences.” (Interviewee #14) |
| National pride | “You see, Hongxing Erke (i.e., a Chinese sportswear brand) is already a national pride, right? When Hongxing Erke donated 50 million CNY, everyone’s sense of national pride was ignited...it’s the same with e-CNY...it’s launched by our own country...patriotic youth always support domestic products regardlessly.” (Interviewee #14) |
| Preference toward domestic goods | “After all, things made by our own country are definitely preferred, since we’re all Chinese ourselves. We are more enthusiastic about products made in China. Domestic products in terms of quality and all other aspects are not inferior to foreign ones, so I generally prefer to use domestically produced goods. I have a similar sentiment towards e-CNY as well.” (Interviewee #25) |

Table 3: Measurement Items

| Construct | Item | Code | References |
| --- | --- | --- | --- |
| Intention | I plan to use e-CNY in the future. | INT 1 | (Davis et al., 1989; Fishbein & Ajzen, 1977) |
| I intend to use e-CNY in the future. | INT 2 |
| I predict I would use e-CNY in the future. | INT 3 |
| *I don’t plant to use e-CNY. (reverse wording)* | INT 4 |
| Perceived value | Compared to the effort I need to put in, the use of e-CNY is worthwhile to me. | VAL 1 | (Kim et al., 2007; Yang & Peterson, 2004) |
| Compared to the time I need to spend, the use of e-CNY is worthwhile to me. | VAL 2 |
| Overall, it is necessary to use e-CNY. | VAL 3 |
| Overall, using e-CNY delivers me good value. | VAL 4 |
| I think using e-CNY provides me with more benefits than costs. | VAL 5 |
| Relative advantage | Compared to Alipay or WeChat, using e-CNY enables me to complete payments more quickly. | RA 1 | (Childers et al., 2001; Kim et al., 2010) |
| Compared to Alipay or WeChat, using e-CNY allows me to save time when making payments. | RA 2 |
| Compared to Alipay or WeChat, using e-CNY makes the payment process faster. | RA 3  RA 4 |
| Compared to Alipay or WeChat, using e-CNY is a more convenient way to make payments. |  |
| Procedural switching costs | *Getting used to how e-CNY works would be easy for me. (reverse wording)* | COS 1 | (Burnham et al., 2003) |
| There are a lot of formalities involved in switching to e-CNY. | COS 2 |
| The process of setting up an e-CNY account is unpleasant. | COS 3 |
| *The process of starting up with e-CNY is quick/easy. (reverse wording)* | COS 4 |
| Habit of using third-party payment platforms | Using Alipay or WeChat has become a habit for me. | HAT 1 | (Limayem & Cheung, 2007; Limayem & Hirt, 2003) |
| I must use Alipay or WeChat when making payments. | HAT 2 |
| I don’t even think twice before using Alipay or WeChat. | HAT 3 |
| Using Alipay or WeChat is natural to me. | HAT 4 |
| When making payments, using Alipay or WeChat is the obvious choice for me. | HAT 5 |
| National identity | When I see the Chinese flag flying, I feel great. | NI 1 | (Kosterman & Feshbach, 1989) |
| I am proud to be a Chinese. | NI 2 |
| I feel very proud of our land in China. | NI 3 |
| The fact that I am a Chinese is an important part of my identity. | NI 4 |

Table 4: Demographics of Participants

|  | Categories | Frequency | Percentage |
| --- | --- | --- | --- |
| Gender | Male | 246 | 43.16% |
| Female | 324 | 56.84% |
| Age | 18-25 | 92 | 16.14% |
| 26-30 | 176 | 30.88% |
| 31-40 | 228 | 40.00% |
| 41-50 | 49 | 8.60% |
| 50 above | 25 | 4.39% |
| Annual salary | 30,000 below | 75 | 13.16% |
| (in yuan) | 30,000-80,000 | 106 | 18.60% |
|  | 80,000 above-150,000 | 263 | 46.14% |
|  | 150,000 above | 126 | 22.11% |
| Occupation | Finance | 54 | 9.47% |
| Information and communications technology | 106 | 18.60% |
| Retailing | 110 | 19.30% |
| Education | 51 | 8.95% |
| Manufacturing | 182 | 31.93% |
| Others | 67 | 11.75% |
| Area | East | 296 | 51.93% |
| Middle | 114 | 20.00% |
| West | 118 | 20.70% |
| Northeast | 42 | 7.37% |
| Education level | High school and below | 14 | 2.46% |
| Associate degree | 77 | 13.51% |
| Bachelor | 439 | 77.02% |
| Masters and above | 40 | 7.02% |

Table 5: Reliabilities of Scales

| Variable | Item | Loading | SE | T-value |
| --- | --- | --- | --- | --- |
| Procedural switching costs | | | | |
| CR= 0.877  AVE= 0.641  Cronbach’s α=0.813 | COS1 | 0.755 | 0.023 | 33.435 |
| COS2 | 0.783 | 0.021 | 37.291 |
| COS3 | 0.818 | 0.016 | 49.973 |
| COS4 | 0.843 | 0.016 | 52.428 |
| Habit of using third-party payment platforms | | | | |
| CR=0.927  AVE= 0.718  Cronbach’s α= 0.902 | HAT1 | 0.810 | 0.047 | 17.115 |
| HAT2 | 0.864 | 0.020 | 42.216 |
| HAT3 | 0.878 | 0.022 | 39.169 |
| HAT4 | 0.837 | 0.025 | 33.098 |
| HAT5 | 0.845 | 0.023 | 36.968 |
| Behavioral intention | | | | |
| | CR=0.929 | | --- | | AVE=0.766 | | Cronbach’s α=0.898 | | INT1 | 0.901 | 0.010 | 85.963 |
| INT2 | 0.898 | 0.010 | 91.716 |
| INT3 | 0.854 | 0.016 | 53.537 |
| INT4 | 0.846 | 0.020 | 42.553 |
| National identity | | | | |
| | CR= 0.905 | | --- | | AVE= 0.704 | | Cronbach’s α= 0.86 | | NI1 | 0.844 | 0.023 | 36.441 |
| NI2 | 0.888 | 0.016 | 53.903 |
| NI3 | 0.832 | 0.025 | 33.647 |
| NI4 | 0.790 | 0.034 | 22.982 |
| Relative advantage | | | | |
| CR= 0.946  AVE= 0.814  Cronbach’s α= 0.924 | RA1 | 0.904 | 0.009 | 101.389 |
| RA2 | 0.907 | 0.009 | 104.999 |
| RA3 | 0.899 | 0.009 | 101.349 |
| RA4 | 0.899 | 0.009 | 100.832 |
| Perceived value | | | | |
| CR= 0.907  AVE= 0.662  Cronbach’s α= 0.875 | VAL1 | 0.834 | 0.017 | 49.301 |
| VAL2 | 0.815 | 0.019 | 43.892 |
| VAL3 | 0.827 | 0.017 | 49.024 |
| VAL4 | 0.836 | 0.017 | 49.441 |
| VAL5 | 0.752 | 0.023 | 32.150 |

Table 6: Loading and Cross-loading

|  | COS | HAT | INT | NI | RA | VAL |
| --- | --- | --- | --- | --- | --- | --- |
| COS1 | 0.755 | 0.079 | -0.467 | -0.213 | -0.382 | -0.486 |
| COS2 | 0.783 | 0.162 | -0.352 | -0.147 | -0.345 | -0.404 |
| COS3 | 0.818 | 0.197 | -0.488 | -0.191 | -0.435 | -0.507 |
| COS4 | 0.843 | 0.123 | -0.414 | -0.223 | -0.457 | -0.543 |
| HAT1 | 0.172 | 0.81 | -0.002 | 0.112 | -0.173 | -0.019 |
| HAT2 | 0.152 | 0.864 | -0.1 | -0.021 | -0.126 | -0.099 |
| HAT3 | 0.159 | 0.878 | -0.104 | 0.005 | -0.139 | -0.058 |
| HAT4 | 0.11 | 0.837 | -0.057 | 0.082 | -0.115 | -0.011 |
| HAT5 | 0.136 | 0.845 | -0.074 | 0.039 | -0.159 | -0.039 |
| INT1 | -0.479 | -0.057 | 0.901 | 0.292 | 0.487 | 0.612 |
| INT2 | -0.485 | -0.086 | 0.898 | 0.266 | 0.477 | 0.643 |
| INT3 | -0.417 | -0.041 | 0.854 | 0.288 | 0.439 | 0.602 |
| INT4 | -0.51 | -0.094 | 0.846 | 0.267 | 0.418 | 0.6 |
| NI1 | -0.197 | 0.054 | 0.278 | 0.844 | 0.225 | 0.372 |
| NI2 | -0.235 | 0.029 | 0.287 | 0.888 | 0.266 | 0.406 |
| NI3 | -0.194 | 0.028 | 0.231 | 0.832 | 0.223 | 0.305 |
| NI4 | -0.191 | 0.057 | 0.267 | 0.79 | 0.18 | 0.352 |
| RA1 | -0.46 | -0.145 | 0.482 | 0.245 | 0.904 | 0.522 |
| RA2 | -0.462 | -0.18 | 0.426 | 0.222 | 0.907 | 0.477 |
| RA3 | -0.441 | -0.173 | 0.46 | 0.23 | 0.899 | 0.487 |
| RA4 | -0.476 | -0.119 | 0.506 | 0.269 | 0.899 | 0.537 |
| VAL1 | -0.456 | 0.011 | 0.567 | 0.409 | 0.437 | 0.834 |
| VAL2 | -0.495 | -0.055 | 0.58 | 0.387 | 0.451 | 0.815 |
| VAL3 | -0.491 | -0.013 | 0.608 | 0.319 | 0.441 | 0.827 |
| VAL4 | -0.512 | -0.053 | 0.582 | 0.343 | 0.459 | 0.836 |
| VAL5 | -0.529 | -0.113 | 0.514 | 0.292 | 0.494 | 0.752 |

Table 7: Descriptive Statistics, Correlation, and Square Root of AVE

| Variable | Mean | Std. Dev | COS | HAT | INT | NI | RA | VAL |
| --- | --- | --- | --- | --- | --- | --- | --- | --- |
| COS | 2.874 | 1.029 | **0.800** |  |  |  |  |  |
| HAT | 5.550 | 0.970 | 0.175 | **0.847** |  |  |  |  |
| INT | 5.944 | 0.869 | -0.540 | -0.080 | **0.875** |  |  |  |
| NI | 6.623 | 0.569 | -0.244 | 0.049 | 0.318 | **0.839** |  |  |
| RA | 5.290 | 1.118 | -0.510 | -0.170 | 0.520 | 0.268 | **0.902** |  |
| VAL | 5.786 | 0.815 | -0.611 | -0.055 | 0.702 | 0.430 | 0.561 | **0.814** |

Note: The bold diagonal values represent the square root of the AVE for each variable.

Table 8: Results of Hypothesis Testing

| Hypothesis | Path coefficient | t | p | Support or not |
| --- | --- | --- | --- | --- |
| H1: VAL → INT | 0.689*** | 19.568 | 0.000 | Yes |
| H2: RA → VAL | 0.338*** | 8.094 | 0.000 | Yes |
| H3: COS → VAL | -0.439*** | 10.724 | 0.000 | Yes |
| H4: HAT → RA | -0.184*** | 4.910 | 0.000 | Yes |
| H5: HAT → COS | 0.187*** | 5.064 | 0.000 | Yes |
| H7: NI → RA | 0.278*** | 6.539 | 0.000 | Yes |
| H8: NI → COS | -0.254*** | 5.759 | 0.000 | Yes |

Note：*** represents statistically significant at the 0.001 level.

Table 9: Results of Mediation Testing

| Variable | Path | Effect | SE | 95% confidence interval | |
| --- | --- | --- | --- | --- | --- |
| Lower bound | Upper bound |
| Habit of using third-party payment platforms | Total effect | -0.143*** | 0.031 | -0.206 | -0.085 |
| Direct effect | -0.043 N.S. | 0.025 | -0.095 | 0.005 |
| Indirect effect | -0.099*** | 0.017 | -0.135 | -0.068 |
| Decomposition of indirect effect |  |  |  |  |
| HAT → RA → VAL → INT | -0.043*** | 0.010 | -0.065 | -0.025 |
| HAT → COS → VAL →INT | -0.057*** | 0.012 | -0.082 | -0.035 |
| National identity | Total effect | 0.165*** | 0.046 | 0.079 | 0.258 |
| Direct effect | 0.024 N.S. | 0.040 | -0.051 | 0.106 |
| Indirect effect | 0.141*** | 0.025 | 0.095 | 0.196 |
| Decomposition of indirect effect |  |  |  |  |
| NI -> RA -> VAL -> INT | 0.065*** | 0.015 | 0.037 | 0.098 |
| NI -> COS -> VAL -> INT | 0.077*** | 0.019 | 0.045 | 0.119 |

Note：*** represents statistically significant at the 0.001 level. N.S. represents not statistically significant.

1. The interview was conducted in Chinese. We translated interview excerpts presented here into English using the forward-backward method. [↑](#footnote-ref-1)
