# Supplementary material
Source: Research Square preprint supplement (doi:10.21203/rs.3.rs-9704769/v1)
Supplement: Supplementary file 2 [file afbba8251bd1b933c7710885.xlsx]

## Sheet: Sheet1
ID	INT1	INT2	INT3	INT4	RA1	RA2	RA3	RA4	COS1	COS2	COS3	COS4	COS5	COS6	COS7	COS8	HAT1	HAT2	HAT3	HAT4	HAT5	NI1	NI2	NI3	NI4	VAL1	VAL2	VAL3	VAL4	VAL5	SD1	SD2	SD3	SD4	gender	age	occupation	annual salary	education	area
1	6	6	6	2	6	6	6	6	6	5	6	5	5	4	4	6	4	4	3	3	4	7	7	7	7	6	6	6	6	6	6	5	6	6	2	6	15	2	2	四川-成都市-新都区
2	4	4	4	4	6	6	6	6	5	6	5	4	6	6	6	4	6	6	6	6	6	7	7	7	7	4	4	5	5	5	3	3	3	2	2	4	15	5	3	四川-成都市-武侯区
3	6	6	6	3	6	6	6	6	6	6	6	5	5	4	4	4	6	6	6	6	6	7	7	7	6	6	6	6	6	6	4	6	6	6	2	6	15	2	4	四川-成都市-郫都区
4	7	6	6	2	6	6	6	6	6	6	4	4	6	6	4	5	7	7	7	7	7	7	7	7	7	6	6	6	6	6	5	5	5	5	2	2	1	1	2	四川-成都市-温江区
5	4	4	4	2	5	5	5	5	5	5	5	5	5	3	3	5	7	7	7	7	7	7	7	7	7	4	4	5	4	4	5	5	5	5	2	3	9	3	2	重庆-重庆市-渝北区
6	7	7	7	1	7	7	7	7	2	4	4	4	6	3	6	3	7	7	7	7	7	7	7	7	7	6	6	4	5	4	5	6	4	2	2	2	15	3	2	河北-邯郸市-磁县
7	4	4	4	4	2	2	2	2	2	2	6	6	6	6	6	6	6	6	6	6	6	7	7	7	7	6	6	6	6	6	6	4	4	4	2	2	12	3	2	河北-邯郸市-磁县
8	7	7	7	2	6	6	6	6	4	4	6	5	6	2	4	5	6	6	6	6	6	7	7	7	7	6	6	7	6	6	6	6	5	6	1	3	10	6	2	广东-广州市-天河区
10	4	4	4	4	4	4	4	5	2	4	5	4	4	4	4	4	6	5	6	6	6	7	7	7	7	5	5	4	4	4	4	3	2	1	2	2	15	1	2	四川-成都市-新都区
11	7	7	7	2	4	5	5	5	5	5	5	5	5	5	5	5	7	7	7	7	7	7	7	7	7	5	5	5	5	5	4	6	6	3	2	2	2	1	1	河北-邯郸市-磁县
13	4	4	4	4	4	4	4	4	4	4	4	4	4	4	4	4	6	4	5	5	4	7	7	7	7	5	5	5	6	4	5	6	6	5	1	3	14	4	2	重庆-重庆市-渝北区
14	4	4	5	3	4	4	4	4	5	5	4	4	5	5	4	4	7	7	7	7	7	7	7	7	7	4	4	4	4	4	4	4	4	4	2	2	10	8	2	北京-北京市-通州区
15	3	4	4	5	4	3	3	3	6	5	3	3	6	7	7	2	7	7	7	7	7	6	5	6	5	3	3	2	2	1	1	1	1	1	2	2	3	3	2	河北-石家庄市-新华区
16	7	7	7	1	7	7	7	7	7	7	4	4	7	4	4	7	7	4	6	6	6	7	7	7	7	6	6	7	7	4	1	1	1	7	2	6	15	2	4	四川-达州市-大竹县
17	6	6	6	5	6	6	6	6	3	6	6	6	4	4	4	5	6	5	6	6	5	7	7	7	7	6	6	6	6	6	6	6	6	6	1	6	11	4	2	四川-成都市-新都区
18	4	5	5	4	4	4	5	4	5	5	5	4	4	4	5	4	5	5	5	5	5	6	6	6	6	5	5	5	5	5	5	4	4	4	2	4	12	2	3	湖南-长沙市-岳麓区
19	5	6	5	2	4	4	5	4	5	5	4	6	6	7	5	4	6	6	6	6	6	7	7	7	7	6	6	6	5	4	3	3	2	5	2	2	1	2	2	河北-邯郸市-磁县
20	6	6	6	2	6	5	4	4	6	6	6	4	6	6	4	4	7	5	6	7	7	7	6	6	7	6	6	6	6	5	3	4	5	6	2	6	15	2	3	四川-成都市-新都区
21	5	5	5	4	5	5	5	5	4	4	5	5	4	4	4	5	6	5	5	6	6	7	7	7	7	5	5	5	5	5	5	6	6	4	2	2	15	1	2	河北-邯郸市-磁县
22	6	6	6	2	6	6	6	6	6	6	4	4	6	4	4	6	5	5	6	6	6	6	6	6	6	6	5	5	5	3	5	5	4	4	2	5	5	2	3	四川-达州市-大竹县
23	6	6	6	2	4	4	4	3	5	6	4	4	4	4	4	4	6	6	5	5	6	6	6	6	6	6	6	6	6	4	3	5	5	4	2	6	8	6	2	四川-成都市-新都区
24	5	5	5	4	4	4	4	4	3	3	3	4	5	5	4	4	6	5	5	5	4	7	7	7	7	4	4	4	4	4	3	3	3	3	1	6	15	3	2	四川-成都市-锦江区
25	6	6	6	1	6	6	6	6	3	2	6	6	3	3	3	6	3	3	3	5	3	6	6	6	6	6	6	6	6	6	3	3	3	3	2	7	15	4	3	四川-成都市-新都区
26	4	4	4	4	4	4	4	4	4	4	4	4	4	4	4	4	4	6	5	5	5	7	6	6	6	4	5	4	4	4	4	4	4	2	2	6	6	2	4	四川-成都市-新都区
28	5	5	5	4	4	5	5	5	4	5	4	4	5	4	4	5	5	4	6	6	5	6	6	6	6	5	5	4	5	4	4	3	5	5	1	5	5	2	4	四川-成都市-新都区
29	5	5	3	4	4	4	4	5	3	3	4	4	5	5	4	4	4	4	4	4	4	6	6	6	6	4	5	5	5	5	5	5	5	5	1	5	3	2	4	四川-成都市-新都区
30	6	6	6	2	6	4	6	6	3	3	3	6	5	4	6	6	6	4	6	6	6	6	7	7	7	6	6	6	6	6	6	6	5	6	2	6	15	4	3	四川-成都市-新都区
31	5	5	5	4	3	4	3	4	4	4	3	4	4	4	4	4	4	3	4	5	4	3	3	3	4	2	4	4	4	4	4	3	3	3	2	5	8	2	3	四川-成都市-新都区
33	4	4	4	4	4	4	4	4	7	6	4	4	7	7	5	4	6	6	6	6	6	6	6	7	6	4	4	4	4	4	5	3	4	5	2	6	15	3	2	四川-成都市-新都区
34	6	6	6	2	4	3	3	4	4	2	6	4	4	2	4	4	6	6	6	6	6	6	6	6	6	6	6	6	6	6	5	5	5	3	1	5	15	8	3	四川-成都市-新都区
35	7	7	7	1	6	6	6	6	3	5	4	4	3	4	2	5	7	5	4	6	6	7	7	7	7	6	6	6	6	6	6	5	5	4	1	4	4	4	2	重庆-重庆-江津区
36	7	7	7	1	5	5	5	5	3	2	6	6	5	2	2	7	5	6	5	6	6	7	7	7	7	6	6	7	7	7	5	6	6	6	1	3	6	5	2	天津-天津市-河东区
37	5	5	5	3	5	5	5	5	5	5	5	5	5	4	4	5	6	5	5	5	5	6	6	6	6	6	6	6	6	6	4	5	4	4	1	4	9	5	3	贵州-黔南
38	7	6	6	2	6	5	6	7	3	2	6	6	6	2	2	6	7	6	7	7	6	7	7	7	6	6	5	7	7	6	7	6	5	3	2	3	11	4	1	河北-保定-徐水区
39	7	7	7	1	6	6	7	6	3	3	5	7	3	3	1	7	5	5	5	5	5	7	7	7	7	5	5	7	7	6	6	6	6	7	1	4	11	8	2	江苏-苏州-相城区
40	4	4	4	3	4	3	3	3	5	4	3	4	4	4	3	5	6	6	6	6	6	7	7	7	7	5	5	5	5	4	4	5	4	5	2	3	6	4	1	广东-肇庆-端州区
42	7	7	7	1	5	4	5	5	1	1	7	7	5	4	1	7	7	7	7	7	7	7	7	7	7	7	7	7	7	7	3	4	4	2	2	3	10	5	2	陕西-渭南-合阳县
43	7	6	6	1	7	7	7	6	4	5	4	7	5	3	2	7	7	7	7	7	6	7	7	7	6	7	7	7	6	6	7	5	7	7	2	3	10	5	2	广西-南宁-兴宁区
44	7	6	7	1	6	7	6	7	1	2	7	6	2	2	1	7	6	7	6	7	6	6	7	6	7	7	6	7	6	7	6	7	6	7	2	4	11	7	2	广东-清远-英德市
45	7	7	7	1	6	7	7	7	5	2	6	6	4	4	2	6	6	6	7	7	7	7	7	7	7	6	7	6	7	7	3	5	3	5	2	2	10	5	1	吉林-长春-农安县
46	5	5	6	4	4	5	3	6	3	5	4	6	5	6	7	3	7	6	7	7	5	7	7	7	7	5	6	4	5	2	5	6	3	2	1	3	2	6	1	新疆-博尔塔拉
48	7	7	7	1	6	6	6	6	2	2	6	6	2	2	2	7	5	6	6	6	6	7	7	7	7	6	6	6	6	6	6	7	6	6	1	2	2	5	2	广东-深圳-宝安区
49	6	6	6	2	4	4	4	4	4	5	4	4	6	4	4	4	7	7	7	7	6	7	7	7	7	6	6	6	6	5	6	6	6	6	2	6	11	8	2	北京-北京市-东城区
50	6	7	6	1	6	5	7	7	3	2	6	7	4	4	2	6	6	5	7	5	5	7	7	7	6	7	6	5	6	4	7	6	5	4	2	2	1	2	2	河北-保定-雄县
51	6	6	6	2	5	4	4	3	2	2	6	6	2	1	1	7	6	5	6	7	6	7	7	7	7	6	7	6	6	5	5	6	6	6	1	4	11	6	2	上海-上海市-宝山区
53	7	6	6	2	6	6	6	6	1	1	7	7	2	2	2	7	6	6	6	6	6	6	7	6	7	6	6	6	6	7	6	6	6	6	1	3	11	6	2	广东-深圳-坪山区
55	6	6	5	2	6	6	6	6	2	5	5	6	3	2	2	5	5	6	5	7	5	5	7	7	7	5	6	6	6	7	6	5	7	5	2	3	11	8	4	上海-上海市-黄浦区
56	7	7	7	1	4	6	7	7	5	4	5	6	4	5	2	3	5	5	4	5	5	7	7	7	7	6	6	6	5	7	6	5	5	5	2	4	11	1	2	吉林-长春-二道区
57	6	7	6	2	7	6	7	7	5	6	4	3	5	4	4	6	7	7	6	5	6	7	7	6	7	7	7	6	7	6	5	6	5	7	2	3	7	4	2	黑龙江-齐齐哈尔-泰来县
58	7	7	7	1	6	6	6	5	4	4	6	7	4	4	4	5	7	6	6	6	5	7	7	7	7	5	5	6	6	6	3	4	3	3	2	3	10	6	2	江苏-徐州-沛县
59	6	7	7	2	7	6	6	6	2	2	6	7	1	1	2	6	7	6	7	5	7	7	7	7	7	7	6	7	7	6	6	6	6	7	2	3	3	5	2	河北-廊坊-大城县
60	7	7	6	1	5	4	4	6	2	2	6	6	3	2	2	6	6	5	6	6	6	7	7	7	6	6	6	5	6	6	5	5	6	5	2	3	11	6	2	广东-深圳-福田区
63	7	7	6	1	6	5	5	5	5	4	6	5	6	3	2	6	7	6	5	7	5	7	7	7	7	6	7	7	6	7	6	5	5	3	2	4	3	5	2	四川-成都-锦江区
64	5	6	6	1	7	5	5	5	2	4	6	6	1	3	3	6	4	4	6	5	4	7	5	6	5	6	6	5	5	4	6	7	6	5	2	3	10	6	2	浙江-杭州-临平区
65	5	5	6	2	5	6	6	7	2	3	5	6	5	4	3	5	7	7	7	7	7	7	7	7	7	5	6	6	6	5	5	5	5	3	2	5	6	5	3	吉林-长春-德惠市
66	5	5	7	2	5	5	7	6	5	3	6	7	5	3	2	6	6	5	5	6	6	7	7	6	6	5	6	6	7	6	6	7	6	5	1	4	11	8	2	福建-泉州-惠安县
68	7	7	6	2	4	4	5	4	5	7	1	3	7	5	5	2	7	6	6	5	7	6	6	5	7	5	5	7	6	6	3	1	3	3	2	3	11	7	2	浙江-杭州-淳安县
69	6	5	5	2	4	4	5	5	5	5	3	6	5	5	4	6	7	6	6	6	7	7	6	6	7	6	6	6	5	4	5	5	4	3	2	2	1	1	2	广东-广州-花都区
72	6	6	6	1	6	7	6	6	1	1	7	7	2	1	2	7	5	5	5	6	5	7	7	7	7	6	7	6	7	6	7	6	7	6	2	4	3	7	2	上海-上海市-闵行区
73	7	6	6	1	7	6	6	6	3	3	5	6	3	3	2	6	5	6	5	6	5	7	6	6	7	6	7	7	6	6	5	5	6	3	2	3	7	6	3	江西-赣州-兴国县
74	4	4	5	4	2	2	2	1	6	6	3	3	7	5	4	4	7	6	7	7	6	5	5	4	5	4	5	5	4	3	3	4	5	5	2	4	6	4	2	湖南-长沙-长沙县
76	7	7	7	1	7	7	7	7	1	1	7	7	2	1	1	7	7	7	7	7	7	7	7	7	7	7	7	7	7	7	7	7	7	7	2	3	8	8	2	山西-太原-尖草坪区
77	6	7	6	1	6	7	7	6	3	2	6	7	2	3	1	7	4	2	1	2	3	6	7	6	7	6	7	6	7	7	5	6	7	6	1	3	11	8	2	四川-成都-大邑县
78	5	5	6	3	5	5	6	5	2	3	6	6	3	3	3	6	5	6	5	6	5	5	6	6	5	6	6	6	5	5	5	5	6	6	2	4	12	6	2	广东-韶关-仁化县
79	6	7	5	2	6	6	7	5	2	2	5	6	2	2	2	5	6	6	6	5	6	6	5	6	7	6	5	6	7	6	6	6	6	6	2	3	9	8	2	上海-上海市-黄浦区
80	5	6	6	2	5	6	4	4	5	4	5	6	5	4	2	4	5	6	4	5	5	6	5	6	6	5	6	5	6	5	3	2	3	2	1	4	8	4	2	湖南-郴州-桂阳县
81	5	4	4	3	3	4	4	5	7	6	4	4	5	5	3	4	7	6	7	7	6	7	6	7	7	4	4	4	4	5	5	4	5	5	1	5	15	3	3	辽宁-营口-站前区
82	4	5	4	4	4	6	3	3	5	5	5	5	4	5	5	5	5	4	5	4	4	5	5	5	7	5	5	4	3	3	4	4	5	5	2	3	8	5	2	广东-广州-从化区
84	6	6	5	3	3	4	5	4	5	2	3	5	4	5	5	5	5	7	6	4	4	5	6	7	7	5	4	5	6	5	5	5	4	2	2	2	4	4	3	江西-赣州-石城县
87	5	5	6	2	5	5	6	5	6	6	3	7	5	4	4	4	6	6	7	7	6	7	7	7	7	6	6	6	7	6	2	3	2	6	1	4	15	4	3	安徽-合肥-瑶海区
88	5	5	6	4	5	6	6	6	4	4	4	6	6	5	7	6	7	7	7	6	6	5	6	7	6	5	6	7	7	5	6	7	7	7	2	3	6	4	2	浙江-宁波-镇海区
89	7	7	7	1	4	5	5	5	2	1	6	7	5	4	2	5	5	5	5	5	5	6	5	6	6	6	5	7	6	5	5	6	6	5	1	5	11	8	2	浙江-绍兴-诸暨市
90	6	6	7	2	6	5	6	6	4	5	3	5	5	6	3	5	6	7	4	6	6	7	6	6	6	5	6	5	5	6	5	6	7	5	2	4	6	2	2	山西-大同-平城区
91	5	5	7	3	5	4	5	4	6	6	5	6	6	3	5	5	6	4	5	5	6	7	6	6	6	6	6	7	7	6	6	5	5	6	1	4	10	4	2	四川-成都-天府新区
92	6	5	7	2	6	7	5	6	3	3	6	6	4	3	2	5	5	5	5	5	5	6	7	6	7	6	5	6	7	6	6	5	6	6	2	5	6	6	2	福建-龙岩-武平县
93	6	6	7	2	6	7	5	6	4	3	6	6	3	2	2	6	6	6	5	6	6	7	7	7	7	6	7	6	7	5	4	6	6	6	1	5	10	7	2	江苏-无锡-惠山区
94	6	7	7	2	5	6	7	7	2	1	6	7	4	5	2	7	7	6	7	6	7	7	7	7	7	6	7	7	6	7	7	6	7	7	2	4	11	8	2	广西-玉林-容县
95	7	6	7	1	6	5	5	4	4	4	4	5	5	4	5	4	5	5	6	5	5	7	7	6	7	6	6	7	7	5	5	5	5	5	2	5	8	5	2	江苏-泰州-姜堰区
97	6	7	6	1	6	7	6	6	2	2	6	7	2	1	2	6	6	7	4	6	6	7	7	7	6	6	7	6	6	7	6	7	6	6	1	4	7	7	2	上海-上海市-徐汇区
98	5	6	6	2	6	6	6	6	3	3	6	6	6	3	2	5	6	7	6	7	6	7	7	7	7	6	6	4	4	6	3	3	2	2	2	3	8	4	2	福建-厦门-同安区
99	5	5	6	4	3	4	3	4	1	2	6	7	5	4	3	5	7	6	6	7	6	6	7	6	7	5	6	5	5	4	3	2	1	1	2	3	8	5	2	河南-鹤壁-山城区
100	5	5	6	3	5	5	6	5	3	3	3	6	3	3	2	6	5	5	6	6	6	5	7	5	7	7	6	6	6	6	6	5	4	4	2	3	6	4	2	浙江-杭州-上城区
101	4	4	4	4	4	4	4	4	4	4	4	4	4	4	4	4	6	5	5	5	5	6	6	6	5	4	4	4	4	4	4	4	4	4	2	5	5	5	3	天津-天津市-和平区
102	5	6	6	2	5	6	6	6	5	5	5	6	5	3	2	5	6	5	5	6	6	7	7	6	6	6	5	6	6	6	6	5	5	6	1	5	11	7	3	江苏-连云港-灌云县
103	5	6	6	2	4	4	4	5	5	5	3	3	6	6	2	4	6	6	6	5	6	7	7	6	7	6	5	6	6	5	6	5	5	4	2	3	8	8	2	山东-济南-历下区
104	5	5	5	2	4	4	4	4	2	2	6	6	3	3	3	5	5	4	5	5	5	7	7	7	7	6	6	6	5	4	4	5	5	5	2	4	6	5	2	浙江-台州-临海市
105	6	5	7	1	7	5	5	6	5	2	7	6	5	2	5	6	6	6	7	7	6	7	7	7	7	7	6	7	6	3	6	5	3	2	1	2	1	1	2	甘肃-兰州-安宁区
106	6	7	6	1	6	7	7	6	5	5	6	7	5	3	2	6	5	5	6	5	6	7	7	7	7	6	7	6	7	6	6	5	6	6	1	4	11	5	1	河南-新乡-卫滨区
107	6	7	6	2	6	7	7	5	3	3	5	6	5	2	2	5	5	4	4	5	5	6	7	7	6	6	5	6	6	7	6	5	6	5	1	5	11	7	2	福建-龙岩-武平县
109	7	6	7	2	7	7	6	6	5	5	4	6	5	3	3	6	7	7	7	7	6	7	7	7	7	6	7	7	6	6	6	7	6	6	1	3	10	6	2	浙江-台州-三门县
110	5	5	5	3	5	5	6	5	5	3	5	5	5	3	2	5	6	5	5	6	6	7	7	7	7	5	5	5	5	5	5	5	5	4	2	4	8	5	2	江苏-南京-江宁区
112	5	5	6	3	6	7	6	6	3	3	5	5	5	4	4	5	5	4	5	5	4	6	7	7	6	6	7	6	6	7	5	6	5	3	2	4	8	5	2	安徽-六安-金寨县
113	5	6	6	1	5	4	4	5	5	4	2	4	5	4	3	4	7	6	7	6	6	7	7	7	6	6	6	7	6	6	4	3	3	4	2	4	3	5	3	广东-汕头-龙湖区
114	7	6	7	1	7	7	6	7	3	3	6	6	3	2	3	6	7	7	7	6	7	7	7	7	7	7	6	7	7	6	5	6	6	5	1	3	10	4	2	宁夏-银川-西夏区
116	6	6	7	2	4	4	4	4	5	5	4	4	5	5	4	4	5	5	5	6	6	7	7	7	7	5	5	6	5	5	5	5	5	5	1	4	11	5	2	辽宁-沈阳-于洪区
117	5	6	6	2	5	5	6	6	3	3	5	6	3	3	3	6	6	6	5	5	5	6	5	5	6	5	5	5	5	5	5	6	6	5	2	4	12	7	2	广东-韶关-曲江区
118	5	5	6	3	4	4	4	5	2	3	7	7	3	2	3	7	5	6	7	6	7	7	7	7	7	6	7	6	6	6	6	7	6	7	2	4	7	6	2	陕西-西安-未央区
119	6	6	6	1	6	5	6	6	2	2	6	7	3	2	2	6	6	5	5	6	5	7	7	7	7	6	6	6	7	6	6	6	7	7	1	4	11	8	2	四川-成都-邛崃市
120	6	6	7	2	6	6	7	7	3	2	6	6	3	1	4	5	5	5	5	6	6	7	7	7	7	6	6	5	6	7	6	6	7	5	1	3	11	7	2	辽宁-营口-老边区
122	6	6	7	3	5	5	6	6	6	6	5	5	5	5	4	5	6	5	5	6	6	7	7	7	7	5	5	6	5	5	5	6	6	6	1	3	9	5	2	广东-深圳-福田区
123	6	7	6	1	5	6	5	6	2	3	6	7	3	3	2	6	3	2	3	3	3	7	7	7	6	6	6	7	7	6	5	6	6	5	2	3	11	8	2	北京-北京-海淀区
124	6	6	6	1	4	4	4	4	1	3	7	7	4	3	3	6	5	4	4	4	4	7	7	7	7	6	6	6	6	6	6	6	6	7	2	5	11	5	2	江苏-扬州-宝应县
125	6	6	6	1	5	7	6	7	2	3	6	6	3	3	2	6	5	6	6	5	6	7	6	6	7	5	6	6	6	7	6	7	6	6	2	4	11	7	2	内蒙古-呼和浩特-新城区
126	7	7	7	1	6	7	6	6	3	2	6	6	5	2	2	6	7	5	6	7	6	7	7	7	7	6	7	7	6	6	6	7	6	6	2	4	6	5	2	辽宁-沈阳-苏家屯区
129	5	6	7	2	6	7	5	7	6	5	2	6	7	6	1	5	6	7	6	6	6	7	7	6	7	6	6	6	7	5	7	5	5	6	1	4	10	6	2	山东-青岛-平度市
131	6	5	7	2	6	7	5	5	3	2	7	6	3	1	2	7	6	5	5	6	6	7	7	6	7	6	7	6	7	3	6	6	7	6	2	2	3	7	2	北京-北京市-丰台区
132	6	6	7	1	4	5	5	6	5	4	6	6	5	4	2	5	5	4	5	5	6	7	6	6	7	6	7	7	6	5	5	6	5	5	2	5	11	6	2	河北-张家口-怀安县
134	6	6	6	2	4	4	4	5	5	5	6	6	6	3	3	5	7	6	6	7	7	7	7	7	7	6	6	7	6	5	5	5	5	4	2	6	7	6	2	广东-深圳-光明区
135	6	6	6	2	5	5	5	4	2	3	6	6	4	3	2	5	5	3	3	4	6	6	6	6	6	6	6	6	6	5	3	5	5	4	1	4	10	6	1	甘肃-兰州-红古区
136	7	7	7	1	3	3	2	2	5	5	3	5	6	5	3	3	6	6	6	6	7	7	7	7	7	6	7	7	7	5	3	3	3	2	1	5	11	8	2	上海-上海市-浦东新区
137	7	7	6	1	6	6	7	7	4	2	7	7	5	3	2	7	6	6	5	6	5	6	6	5	5	6	7	7	7	7	3	3	2	1	2	4	14	7	1	重庆-重庆市-渝中区
138	5	5	6	2	5	6	5	4	2	3	5	5	5	2	3	5	7	5	6	7	6	7	7	7	7	5	5	6	5	5	2	2	3	1	2	3	6	4	2	安徽-淮北-烈山区
139	6	7	6	2	6	7	6	6	2	1	6	7	2	1	2	7	6	6	6	7	6	7	7	6	6	6	6	7	6	7	6	6	6	5	1	3	11	6	2	江西-赣州-于都县
140	6	7	6	2	6	7	6	6	6	5	5	6	5	2	1	5	5	6	5	6	6	7	7	6	7	6	6	7	6	7	6	6	5	6	2	4	12	4	3	广东-东莞-横沥镇
141	6	7	6	2	6	5	4	5	3	2	6	6	5	3	4	5	6	5	6	7	6	7	7	7	7	5	6	6	5	5	6	5	6	5	2	3	7	5	2	四川-德阳-什邡市
142	5	5	5	2	3	3	4	3	5	5	3	4	5	4	3	4	6	4	5	5	5	7	7	6	7	5	5	6	6	5	5	5	5	6	1	3	11	5	2	山东-青岛-市北区
144	6	5	7	1	5	6	6	6	3	2	7	6	3	2	1	5	5	4	3	5	5	7	6	6	7	7	6	7	6	5	5	5	6	5	2	3	3	5	3	江西-赣州-信丰县
145	6	6	7	2	5	6	6	5	2	3	6	5	3	2	2	6	5	5	6	6	5	6	6	7	6	6	6	7	6	6	5	6	6	6	1	3	10	7	2	河南-南阳-社旗县
149	5	6	6	1	5	6	5	6	4	3	4	4	4	3	2	5	5	6	5	5	6	7	6	6	7	6	5	6	6	7	6	5	6	7	1	4	11	6	2	黑龙江-哈尔滨-道外区
151	6	7	6	2	6	5	5	6	6	7	2	5	6	2	2	6	7	7	7	6	2	7	7	7	7	7	7	7	7	7	5	6	6	3	2	4	11	8	1	广东-广州-南沙区
152	5	5	7	2	4	4	3	4	3	2	6	6	5	3	3	5	6	6	7	6	6	7	7	7	6	7	6	7	6	7	3	2	2	2	1	2	1	1	2	山东-泰安-新泰市
153	5	5	6	2	5	4	4	3	4	3	5	5	4	3	5	3	7	6	6	7	7	7	7	7	7	5	5	6	7	5	5	5	6	4	1	3	6	7	1	河北-石家庄-桥西区
155	6	5	6	2	5	6	6	5	5	5	6	4	5	4	3	5	7	6	7	6	6	7	6	7	7	6	7	5	6	5	7	6	7	6	1	3	10	5	2	河南-郑州-郑东新区
157	7	7	7	2	5	5	4	4	3	3	3	5	5	4	3	6	6	7	6	7	7	7	7	7	7	7	7	6	6	6	6	6	6	6	2	2	7	2	1	河南-洛阳-西工区
159	5	5	6	3	4	5	5	4	5	5	3	3	5	3	3	4	6	5	5	6	6	6	6	6	6	6	6	5	6	5	5	5	5	5	1	5	6	4	2	四川-泸州-龙马潭区
160	5	6	7	2	4	4	4	4	5	5	4	4	5	5	5	3	6	5	5	6	6	7	7	7	7	5	5	6	6	5	4	5	5	5	1	5	15	8	2	上海-上海-浦东新区
162	5	5	5	2	4	4	3	4	4	2	5	5	5	4	4	5	5	5	5	6	5	6	6	7	6	5	5	5	4	5	4	5	5	3	2	3	8	5	2	四川-成都-高新区
163	5	7	5	2	6	7	6	6	2	2	6	6	2	1	1	6	6	2	2	2	2	6	6	7	6	6	6	6	7	5	5	6	6	6	2	4	11	6	2	天津-天津-红桥区
164	6	6	7	2	5	5	5	6	5	5	6	6	5	3	2	6	7	6	6	7	7	7	7	7	7	6	6	7	7	6	5	6	6	5	2	4	11	6	2	江苏-南京-江宁区
166	5	5	4	4	6	6	7	6	2	1	6	7	3	2	3	6	6	5	7	6	6	7	7	7	7	6	6	7	6	6	5	5	5	4	1	4	10	5	2	浙江-杭州-临安区
167	6	6	6	2	6	6	6	6	6	5	5	5	6	6	4	3	6	2	2	3	2	7	7	7	7	6	6	5	6	4	6	6	6	5	2	2	8	3	2	重庆-重庆市-万州区
168	7	7	7	2	6	6	7	7	3	2	7	7	4	2	2	7	5	5	5	5	3	7	7	7	7	7	7	7	7	7	6	6	6	6	2	4	3	2	2	福建-泉州-泉港区
169	5	4	5	5	4	6	5	5	5	6	4	5	6	5	4	6	5	4	7	3	5	5	6	5	5	5	6	4	4	6	5	5	4	4	1	3	8	5	2	广东-广州-越秀区
171	6	7	7	2	5	3	3	4	5	5	6	6	5	5	4	5	6	6	6	6	6	7	7	7	7	7	7	6	7	7	6	6	6	6	2	4	9	4	2	北京-北京市-通州区
172	4	5	5	3	4	3	2	3	1	1	6	6	6	4	3	5	6	5	7	6	5	4	4	4	5	3	2	3	4	2	3	3	2	2	2	5	12	5	1	天津-天津市-南开区
174	5	5	6	2	6	6	7	7	6	4	6	6	3	4	3	5	5	4	4	3	3	5	6	6	7	5	5	6	5	6	4	5	5	6	2	3	6	3	2	福建-福州-闽清县
175	6	6	6	3	5	5	6	6	5	5	3	4	3	3	2	6	7	6	7	7	6	5	5	5	6	6	6	6	6	5	3	3	3	2	1	4	6	6	2	天津-天津-武清区
177	6	7	6	2	4	4	4	4	3	3	6	7	4	3	1	7	5	5	5	7	6	7	7	7	5	5	6	6	7	7	6	5	6	6	2	3	8	7	2	广东-云浮-新兴县
178	7	6	6	1	6	5	6	6	2	1	6	6	3	3	2	6	5	6	6	5	6	7	7	6	6	5	6	7	6	6	6	5	6	5	1	4	11	6	2	黑龙江-大庆-龙凤区
179	5	5	5	2	4	5	5	5	5	5	5	4	5	5	4	4	6	5	6	5	5	6	7	7	7	4	4	5	5	5	3	5	4	3	2	4	5	4	2	广东-惠州-惠阳区
180	7	6	6	1	6	5	7	5	3	4	5	6	3	1	2	6	6	7	5	6	7	6	7	5	7	6	5	7	6	7	6	5	7	6	1	2	10	5	2	山东-枣庄-薛城区
181	6	6	7	3	6	5	5	5	3	3	5	6	3	3	2	5	4	4	4	3	3	7	7	7	6	5	6	6	6	5	5	5	6	5	2	4	14	6	2	重庆-重庆市-荣昌区
182	7	6	7	1	6	7	6	7	3	3	6	7	5	3	3	7	7	7	6	7	7	7	7	7	7	7	7	6	6	7	6	7	6	6	1	4	3	7	2	四川-成都-金堂县
183	6	6	6	1	4	5	5	5	5	2	7	6	2	2	2	6	5	5	6	6	5	7	7	7	7	6	5	6	6	6	6	6	6	6	2	3	11	8	2	广东-深圳-罗湖区
185	6	7	6	1	6	5	6	5	6	5	7	5	1	2	2	6	6	7	5	6	5	6	5	6	5	5	6	6	7	5	6	5	6	5	2	3	9	5	2	广东-深圳-南山区
186	6	7	6	2	5	5	6	5	6	5	5	6	4	4	3	6	5	5	6	5	6	7	6	6	7	5	6	6	7	6	5	6	6	5	2	4	8	7	2	上海-上海市-静安区
187	6	6	7	1	7	4	4	5	5	3	7	7	4	2	1	7	6	6	5	6	6	7	7	7	7	6	6	5	6	5	3	3	4	3	2	5	15	5	3	福建-福州-台江区
188	6	7	6	1	5	7	5	6	5	2	6	7	2	1	1	6	6	7	6	6	5	7	5	6	5	7	5	7	6	5	3	7	5	6	1	3	6	5	2	广东-广州-越秀区
192	6	6	7	3	6	6	6	6	5	5	4	4	6	4	3	4	6	6	4	5	6	6	7	6	7	6	5	7	6	6	4	4	4	4	1	4	4	3	3	江苏-常州-钟楼区
193	6	7	6	2	6	5	7	6	3	3	2	6	2	1	2	6	5	5	6	5	5	7	7	6	6	6	7	6	7	7	5	5	6	5	1	4	8	6	2	浙江-杭州-拱墅区
194	6	5	7	3	5	4	5	4	2	3	6	7	5	4	3	5	6	6	5	6	5	7	6	7	6	5	5	4	6	5	4	5	5	5	1	4	9	6	2	天津-天津市-滨海新区
195	6	6	6	1	4	4	5	5	5	3	3	5	3	4	3	5	7	7	7	7	6	7	7	7	7	6	6	5	5	5	5	5	5	4	1	2	1	5	2	山东-济南-槐荫区
196	7	7	7	1	6	6	6	6	1	1	7	7	5	2	1	7	5	5	5	6	6	7	7	7	7	7	7	7	7	7	2	6	5	3	1	5	11	7	2	江苏-苏州-昆山市
197	7	7	7	1	7	7	7	7	3	3	7	7	3	2	1	7	7	6	7	7	7	7	7	7	7	7	7	7	7	7	7	7	7	7	1	4	6	7	2	广东-广州-南沙区
199	7	7	6	2	4	3	2	5	2	2	5	6	5	3	1	7	7	4	3	5	2	7	7	7	7	7	7	6	7	6	4	3	4	2	2	3	9	4	2	广东-汕尾-海丰县
200	7	7	7	1	5	5	5	6	3	3	1	7	5	3	2	5	6	5	5	6	6	7	7	7	7	6	6	6	6	6	6	6	6	6	1	4	4	7	2	山东-青岛-城阳区
201	6	7	6	2	6	7	7	7	6	5	3	4	6	3	2	6	5	6	7	7	5	7	7	7	7	6	7	6	7	5	5	6	5	4	1	2	12	5	2	河北-唐山-古冶区
202	6	6	5	2	4	4	4	3	4	3	4	4	6	6	3	5	7	6	6	6	6	6	5	6	6	6	5	6	6	7	6	6	6	6	1	3	6	5	2	湖北-孝感-安陆市
203	6	5	5	2	6	6	6	7	4	5	4	4	6	6	4	4	6	7	7	7	6	6	7	6	7	6	6	6	7	5	6	5	5	4	1	3	10	5	2	北京-北京-门头沟区
205	6	5	5	3	5	6	6	5	3	2	6	6	3	4	3	5	7	7	6	6	7	7	7	7	7	6	6	5	5	5	6	5	5	6	2	3	6	5	2	四川-自贡-沿滩区
207	7	7	7	1	6	7	6	7	1	2	6	6	2	1	2	6	7	7	6	6	6	6	7	7	7	6	6	7	7	6	6	5	6	5	1	4	9	6	2	山东-枣庄-薛城区
210	4	4	3	4	5	3	5	4	3	3	5	2	3	3	5	5	4	3	5	4	4	5	4	5	4	4	5	4	5	3	5	4	5	5	2	5	2	7	3	广东-深圳-福田区
211	5	6	6	3	4	4	5	4	6	5	6	6	4	4	4	6	5	6	5	5	6	6	6	6	6	6	6	6	6	6	3	3	3	2	1	4	3	5	2	河北-石家庄-正定县
212	7	7	7	1	7	7	6	7	3	3	7	6	2	1	1	7	4	3	3	4	5	7	7	7	7	6	7	7	7	7	6	6	7	6	2	4	11	6	2	湖南-郴州-永兴县
215	4	4	5	3	3	4	4	4	5	5	3	4	6	5	4	4	7	7	6	6	6	7	7	7	7	4	4	5	5	4	2	3	2	3	1	4	6	5	3	山东-德州-齐河县
216	6	7	6	2	6	7	6	5	3	4	5	4	4	3	2	5	6	5	6	6	7	6	7	6	7	6	6	7	7	5	4	5	4	5	1	4	10	5	2	江西-萍乡-湘东区
217	7	6	6	1	7	6	6	7	2	2	6	7	5	4	4	4	5	5	6	6	6	7	7	7	7	6	7	6	6	7	4	5	5	5	1	2	1	2	1	重庆-重庆市-南岸区
218	6	6	7	2	7	7	6	6	2	2	6	6	2	2	1	6	5	3	4	4	5	6	7	7	6	6	6	6	7	7	3	4	4	3	1	4	9	4	2	江苏-常州-金坛区
219	7	7	7	1	6	6	6	6	2	1	6	6	2	1	3	7	5	5	5	5	5	7	7	6	7	6	7	6	7	6	6	6	7	6	1	4	10	7	2	上海-上海市-闵行区
220	6	5	5	2	6	5	6	5	3	2	5	6	2	3	2	5	5	5	6	5	5	6	5	6	6	5	6	6	5	6	6	5	5	6	1	4	2	5	2	山西-太原-晋源区
221	7	7	7	1	6	6	6	6	2	2	6	6	2	2	2	6	6	5	5	5	5	7	7	7	7	6	6	7	7	7	7	7	6	6	1	5	4	6	2	河南-开封-龙亭区
222	6	6	7	1	6	6	6	6	3	2	6	6	2	2	2	6	5	4	4	3	2	7	7	7	7	6	6	6	6	6	4	3	5	5	2	4	11	7	2	山东-潍坊-滨海经济技术开发区
224	7	7	7	2	6	6	6	7	5	5	3	5	5	3	2	5	7	7	7	7	7	7	7	7	7	7	7	6	6	7	3	3	3	3	1	4	8	5	2	福建-宁德-屏南县
225	7	7	6	1	5	7	5	6	6	3	5	6	3	2	1	6	5	4	5	6	5	6	7	7	6	5	7	6	7	6	7	7	5	6	2	4	8	6	2	辽宁-鞍山-铁西区
227	6	7	5	1	5	7	5	6	3	2	5	6	3	2	1	5	6	5	5	5	6	6	7	7	7	6	5	6	7	7	4	3	3	3	2	4	3	6	3	辽宁-沈阳-康平县
228	5	4	4	4	4	4	5	4	4	4	4	4	4	4	3	4	5	6	5	5	5	6	6	5	5	4	4	4	4	4	4	5	5	6	2	4	2	4	3	广东-珠海-斗门区
230	6	7	6	1	7	6	5	6	6	7	5	5	6	7	6	6	6	7	6	6	6	6	7	6	5	5	7	5	7	5	6	7	6	5	1	4	6	6	2	广东-广州-海珠区
231	6	6	6	2	4	4	6	4	5	5	6	6	6	3	2	6	7	6	6	6	6	7	7	7	7	6	6	6	6	4	3	2	3	3	1	4	2	5	2	广东-广州-番禺区
232	6	7	7	2	3	3	4	5	5	2	7	6	5	2	1	6	7	7	7	6	7	6	7	7	7	4	5	6	7	4	1	2	1	1	1	4	2	3	3	广东-珠海-香洲区
233	6	7	7	1	5	5	6	5	4	5	5	6	4	3	3	5	5	5	6	6	5	7	6	6	7	5	6	6	5	6	5	5	6	5	1	4	8	6	2	上海-上海市-普陀区
234	7	7	7	1	7	6	6	7	1	1	7	7	5	2	1	6	6	3	6	6	6	7	7	7	7	6	7	7	7	6	2	5	5	2	1	6	11	8	3	重庆-重庆市-渝北区
236	6	6	6	2	5	5	5	6	3	3	6	6	5	5	4	3	6	5	6	6	6	7	7	7	7	6	6	4	4	4	6	5	5	4	1	2	9	3	3	四川-成都-彭州市
237	6	6	6	2	5	5	6	5	3	3	6	6	5	4	3	5	6	6	6	7	6	7	7	7	7	6	6	7	6	6	6	5	5	6	1	3	6	4	2	河北-石家庄-新华区
238	5	6	7	3	4	5	5	6	5	6	5	4	3	4	3	5	3	5	4	5	4	6	6	4	7	4	6	5	7	6	5	5	7	4	1	3	11	4	1	江苏-南通-通州区
239	6	7	7	1	6	5	6	7	5	5	7	6	5	4	1	6	6	5	5	6	5	6	7	7	6	6	7	6	6	7	5	5	4	5	1	4	11	5	2	河北-秦皇岛-山海关区
246	7	6	6	2	5	5	6	6	3	5	5	5	5	5	3	5	7	5	5	6	6	7	7	7	7	6	6	6	6	5	5	5	5	5	2	4	9	5	2	江苏-常州-钟楼区
249	4	5	5	1	3	3	3	3	1	2	4	7	1	1	1	7	6	5	5	7	5	7	7	7	7	7	7	7	7	7	5	7	7	7	2	2	3	2	2	湖北-武汉-新洲区
251	5	5	5	2	6	6	5	6	5	5	5	7	3	3	3	6	5	5	6	6	6	7	7	7	6	7	6	7	7	6	5	5	6	5	2	3	8	7	2	河南-郑州-巩义市
252	7	7	7	1	7	7	7	7	1	1	7	7	1	1	1	7	6	6	6	6	5	7	7	7	7	7	7	7	7	7	7	7	7	6	2	4	11	8	3	广东-东莞-寮步镇
253	7	7	7	2	4	4	4	5	2	2	6	6	3	2	2	6	6	6	5	5	5	7	7	7	7	6	7	6	7	6	5	5	6	5	1	5	12	6	1	河北-石家庄-井陉矿区
254	6	5	5	3	5	5	5	5	3	3	5	5	3	3	3	5	5	5	6	6	5	7	7	7	7	6	6	6	6	6	5	5	5	5	2	4	11	5	2	河北-邢台-南宫市
257	6	6	6	2	4	4	4	6	5	5	3	6	5	6	3	5	7	7	7	7	7	7	7	7	7	6	7	6	7	5	5	5	5	5	1	4	11	5	2	山东-德州-运河新区
260	7	7	7	1	6	6	7	7	5	6	3	5	5	3	5	5	6	5	5	5	6	7	7	6	7	6	7	6	7	6	6	6	7	5	1	4	9	5	2	河南-洛阳-洛宁县
263	5	5	5	3	4	3	3	3	6	6	3	3	5	5	5	4	6	5	6	6	5	7	7	7	7	5	5	5	5	5	5	5	6	5	2	3	6	4	2	北京-北京市-东城区
266	4	3	5	5	6	7	7	6	6	6	4	4	6	5	6	6	6	6	7	6	6	6	6	6	7	6	6	5	7	5	6	6	6	6	2	4	2	5	3	河北-邢台-襄都区
268	6	6	6	2	5	5	6	6	4	3	6	6	3	4	4	5	6	6	6	7	6	6	7	7	6	6	6	6	6	5	3	4	3	4	2	2	1	1	2	贵州-六盘水-六枝特区
269	6	5	7	3	6	7	7	5	5	3	2	6	3	1	2	6	5	5	6	6	1	6	6	7	5	2	3	6	5	7	6	5	6	5	2	5	3	3	2	山西-长治-长子县
270	4	4	5	3	4	4	4	3	5	5	3	3	5	4	4	4	7	6	7	7	7	4	5	5	7	5	5	4	4	4	3	3	5	5	2	3	13	2	2	山西-太原-尖草坪区
271	5	5	6	3	5	5	5	5	4	5	3	4	5	4	5	4	5	6	5	6	5	7	7	7	7	5	5	5	5	5	4	4	5	3	2	2	1	1	2	新疆-喀什
272	5	6	6	3	4	4	5	5	3	3	5	5	5	6	6	5	7	6	7	6	6	7	7	6	6	5	6	5	6	4	2	2	1	3	2	3	9	3	2	江西-南昌-青山湖区
273	5	6	6	4	5	4	4	4	5	5	5	6	6	5	5	5	6	6	6	5	5	7	7	7	7	6	6	5	6	6	6	5	5	6	1	4	9	5	1	河北-邯郸-曲周县
274	6	6	5	2	3	4	4	4	6	5	6	7	5	3	4	6	7	5	7	6	5	7	7	7	7	7	6	5	6	7	6	7	6	7	1	3	10	6	2	重庆-重庆市-沙坪坝区
275	6	7	6	2	5	6	4	5	3	3	5	6	3	4	2	5	6	3	4	3	4	7	6	6	6	5	6	7	6	6	5	5	4	5	2	4	7	8	2	湖北-随州-曾都区
276	5	5	6	2	5	5	6	6	2	3	4	5	6	6	5	3	7	6	6	5	4	7	7	7	6	5	6	3	6	3	2	2	3	2	2	3	4	4	2	湖北-武汉-武昌区
277	4	3	5	5	4	3	5	5	4	2	5	5	5	5	4	4	6	5	4	6	4	6	7	6	6	4	4	4	3	5	3	2	3	3	2	2	4	4	3	广东-广州-越秀区
278	6	6	6	1	5	5	5	5	2	2	6	6	4	4	4	4	6	6	5	6	6	6	6	6	6	7	7	7	6	6	5	5	5	5	2	4	11	7	2	山东-济宁-曲阜市
279	6	7	7	1	5	6	6	7	2	1	6	7	2	2	3	6	6	7	6	6	7	7	7	6	6	6	5	7	6	6	5	6	5	3	2	3	9	6	2	广东-东莞-横沥镇
280	6	6	6	2	6	7	5	6	5	6	5	6	5	1	2	6	6	7	5	6	6	7	7	6	7	5	6	6	6	6	7	3	3	4	2	4	3	6	2	北京-北京市-朝阳区
281	6	6	6	2	6	6	5	5	5	3	5	6	5	3	3	6	5	5	5	5	6	6	6	6	6	5	5	5	6	5	4	3	3	2	1	2	10	6	2	浙江-杭州-萧山区
284	6	6	7	1	6	6	6	6	4	3	6	6	6	4	2	4	5	5	5	5	5	7	7	7	7	6	6	6	6	6	4	5	5	4	2	2	1	1	2	江西-南昌-东湖区
288	5	5	5	1	6	6	5	6	6	5	5	5	5	5	6	5	5	5	6	6	6	7	7	7	7	6	5	5	5	6	5	6	5	5	2	3	8	7	2	吉林-长春-榆树市
289	5	6	6	2	4	5	5	4	5	5	5	4	5	3	4	5	6	4	5	5	5	6	5	6	6	6	5	6	6	6	5	5	5	6	1	4	10	8	2	北京-北京市-朝阳区
290	7	7	7	2	4	4	4	5	3	3	6	6	4	4	5	4	7	7	7	7	7	3	3	3	3	6	6	7	7	4	2	1	2	1	1	4	6	5	2	上海-上海市-浦东新区
291	6	6	7	2	6	6	6	7	4	3	6	6	6	3	5	6	7	7	5	5	5	6	6	6	6	6	6	6	6	4	4	4	3	2	1	2	10	4	2	河南-洛阳-孟津区
292	6	6	7	2	5	5	6	5	2	2	6	6	3	2	2	6	5	5	6	5	6	7	6	6	7	5	6	6	7	6	5	5	6	5	1	4	11	8	2	广东-深圳-宝安区
293	6	6	6	2	4	5	6	5	3	4	5	5	5	4	4	5	6	5	5	6	6	7	7	7	7	5	5	4	5	5	6	6	5	4	2	3	6	7	2	四川-德阳-什邡市
294	6	6	7	2	5	5	6	6	6	3	5	5	4	3	3	5	6	5	5	6	5	7	7	7	7	5	6	5	6	6	5	6	5	5	2	3	6	5	2	四川-宜宾-筠连县
295	5	4	4	3	2	2	3	1	3	3	6	7	2	2	5	6	7	5	6	7	6	7	7	7	7	5	5	6	6	7	6	6	5	2	1	2	1	1	3	广东-广州-白云区
296	6	6	7	2	6	5	5	6	2	3	6	6	3	2	1	6	6	6	5	7	6	7	6	6	7	6	7	6	7	7	5	6	6	5	2	3	10	5	2	湖南-长沙-长沙县
297	7	7	7	1	6	7	6	7	2	1	7	7	3	2	1	7	7	7	7	7	7	7	7	7	7	7	7	7	6	7	6	7	7	7	2	5	15	5	3	广东-广州-荔湾区
299	6	7	7	1	3	3	4	4	2	2	7	6	2	2	3	7	5	4	5	5	5	7	7	7	7	6	6	7	6	5	6	6	6	4	2	2	7	5	3	广东-广州-白云区
300	7	6	7	2	6	7	7	7	4	2	5	6	4	2	3	7	6	6	7	7	7	7	7	7	7	6	7	6	6	6	7	5	5	6	2	4	7	5	2	广东-清远-连南瑶族自治县
301	5	5	5	1	6	6	5	5	6	6	1	3	5	5	1	3	7	5	6	6	6	7	7	7	7	6	6	6	6	6	2	3	2	2	2	3	9	5	2	山西-大同-新荣区
302	5	6	5	2	5	7	6	5	3	1	5	6	2	1	3	2	6	5	4	6	5	7	6	7	5	7	5	6	5	7	3	5	6	3	2	4	7	8	2	广东-汕头-金平区
305	5	6	6	2	5	6	6	6	5	5	7	5	5	5	2	5	6	7	5	7	6	7	5	7	6	5	6	5	7	6	5	6	5	3	1	3	10	6	2	福建-厦门-集美区
309	7	6	6	1	6	7	6	7	3	2	6	7	5	4	2	4	7	6	7	6	6	7	6	6	7	6	6	6	7	6	5	5	6	6	2	4	7	8	2	江苏-镇江-润州区
310	7	7	7	1	6	6	6	7	2	2	6	7	1	1	3	6	6	3	4	4	5	7	7	7	7	7	7	7	7	7	5	4	4	5	1	4	3	5	3	河北-石家庄-平山县
311	6	6	7	1	5	6	6	7	3	2	6	7	6	3	2	6	6	6	6	7	6	7	6	6	7	6	7	6	6	7	3	2	1	2	1	3	2	5	2	四川-自贡-自流井区
312	6	7	5	2	6	7	5	6	3	2	5	6	5	3	1	6	5	6	7	5	6	6	7	5	6	6	5	7	5	6	5	4	6	4	1	2	6	6	2	河南-郑州-惠济区
314	6	6	6	2	6	6	6	6	3	3	5	5	6	5	5	3	7	7	7	7	7	7	6	6	3	5	5	6	6	7	1	1	2	2	2	2	1	1	2	河南-平顶山-舞钢市
316	5	5	6	2	6	6	6	5	4	5	6	7	6	2	3	6	6	3	3	3	4	7	7	6	6	6	6	5	6	4	3	3	3	2	2	4	3	4	3	广东-深圳-坪山区
318	5	5	5	4	5	4	4	4	6	6	2	3	6	5	4	4	6	6	6	6	6	7	7	7	7	6	6	4	4	4	6	6	7	7	2	5	6	5	1	内蒙古-乌兰察布-卓资县
319	7	7	6	1	6	5	6	4	2	1	6	7	5	3	1	6	6	7	7	7	7	7	7	7	7	6	6	7	7	6	6	6	5	5	2	3	11	8	2	陕西-西安-莲湖区
320	6	7	7	1	4	4	4	6	3	2	6	6	5	3	2	6	6	5	6	6	6	6	5	5	6	6	6	6	6	6	3	5	5	2	1	4	2	4	2	山西-运城-绛县
321	5	5	6	2	5	3	4	3	5	5	3	5	3	3	3	5	6	5	5	6	6	7	7	6	6	6	6	6	6	5	7	6	5	5	1	4	14	5	2	山东-聊城-茌平区
322	5	5	7	2	6	6	6	7	5	5	2	5	5	4	4	4	7	5	7	7	7	7	7	7	7	7	7	7	7	4	4	4	6	7	2	2	1	2	2	浙江-嘉兴-海盐县
323	7	7	7	1	7	6	6	6	5	5	6	6	6	2	2	6	6	6	6	6	6	7	7	7	7	7	7	7	7	7	5	6	5	5	2	4	6	5	2	山东-枣庄-市中区
324	6	6	6	2	6	4	6	4	5	4	4	5	5	4	4	5	7	6	6	6	6	7	7	7	7	7	7	7	7	4	3	3	2	5	2	2	1	1	2	广东-广州-白云区
325	6	7	7	2	6	7	6	6	3	3	2	6	3	1	1	6	3	3	2	3	2	7	7	6	7	6	7	6	6	7	5	5	6	4	2	3	9	5	2	黑龙江-哈尔滨-木兰县
326	7	7	7	1	5	5	5	6	1	2	7	7	2	1	1	6	6	5	6	7	6	7	7	7	7	6	6	6	7	7	5	6	6	5	1	4	10	5	2	安徽-淮南-潘集区
327	7	6	7	1	6	4	7	5	5	6	4	4	5	2	1	7	7	6	6	7	6	7	7	7	6	7	7	6	7	6	6	7	7	5	2	4	6	4	3	陕西-咸阳-三原县
328	7	7	7	1	4	4	4	4	2	2	6	6	6	5	5	3	7	7	7	7	7	7	7	7	7	6	6	6	6	6	7	7	7	2	2	2	15	1	2	河北-邯郸-大名县
330	7	6	7	1	7	7	7	7	3	4	3	7	3	3	1	7	4	4	4	5	4	7	7	7	7	5	5	7	6	5	6	7	6	7	2	3	2	5	2	山东-临沂-沂水县
331	5	5	6	2	4	4	5	5	4	5	3	4	5	5	4	4	6	4	5	5	4	7	7	6	7	6	6	5	5	4	6	7	5	4	2	3	10	7	2	湖北-荆州-石首市
332	5	6	6	7	5	6	5	7	5	4	2	3	4	5	1	4	7	6	5	7	6	7	6	7	6	6	5	6	7	6	5	4	6	4	2	2	15	6	1	宁夏-固原-隆德县
333	7	6	7	1	5	6	7	6	3	2	5	6	6	4	3	5	6	7	6	5	6	6	7	6	5	5	6	7	6	5	5	6	7	6	1	4	10	6	2	四川-成都-温江区
334	6	7	6	1	5	7	6	7	3	1	6	7	3	2	1	7	4	3	3	2	4	6	7	6	7	7	6	6	7	6	6	6	7	7	1	3	10	6	2	内蒙古-赤峰-林西县
335	7	7	7	2	6	6	6	6	5	6	4	4	5	5	3	4	6	4	4	4	4	7	7	7	7	6	6	6	6	6	6	5	5	5	2	4	11	5	1	四川-南充-蓬安县
336	5	5	5	2	4	4	4	4	2	3	6	5	4	2	3	6	7	6	6	7	6	7	7	6	6	6	7	6	5	6	5	5	6	6	2	4	6	5	2	上海-上海市-浦东新区
337	4	4	4	4	3	3	4	4	5	5	4	4	4	4	5	4	7	7	7	7	6	7	7	6	6	4	4	4	5	4	3	5	6	5	1	3	9	5	2	河南-郑州-二七区
338	5	5	5	2	5	5	5	5	3	3	5	5	3	3	3	5	5	5	5	5	5	6	6	6	6	5	5	6	7	5	5	5	3	5	2	3	3	1	3	河北-廊坊-大城县
344	6	6	7	2	5	6	5	6	2	4	3	6	5	6	6	5	6	5	7	7	5	7	7	7	7	6	5	7	6	6	2	3	3	4	1	3	10	6	2	广东-深圳-福田区
345	6	6	6	2	6	6	6	6	2	2	6	6	6	6	2	6	6	6	6	6	6	7	7	7	7	7	7	6	6	6	6	6	7	5	1	2	10	8	2	山东-青岛-黄岛区
347	5	5	4	3	3	3	3	3	5	2	5	3	4	3	3	5	7	6	6	5	6	7	6	7	7	5	5	6	6	6	5	7	7	6	2	3	4	7	2	河北-邯郸-曲周县
348	5	7	6	2	6	7	5	5	5	6	3	4	5	4	3	5	7	7	6	6	7	7	7	6	7	7	6	7	6	4	3	5	5	4	2	2	7	3	2	宁夏-银川-永宁县
349	1	1	1	7	4	4	2	3	6	7	1	2	6	6	7	1	1	6	6	6	6	5	4	4	4	1	1	1	1	1	1	2	1	1	1	4	6	6	2	江苏-常州-天宁区
350	4	7	4	1	7	7	7	7	1	1	6	6	1	1	1	7	7	7	7	7	7	7	7	7	7	7	7	7	7	7	7	7	7	7	2	4	6	8	3	北京-北京市-西城区
351	7	6	7	1	7	6	6	7	2	2	7	6	1	2	1	6	6	6	6	6	6	7	7	7	7	6	6	7	6	7	7	6	6	7	1	3	6	8	2	北京-北京市-朝阳区
352	4	4	4	4	3	4	3	3	6	3	4	4	5	4	4	3	7	6	7	7	6	7	6	6	7	5	5	4	6	4	4	3	5	6	2	3	12	5	2	贵州-贵阳-息烽县
353	6	7	6	2	6	7	6	6	5	5	5	6	6	5	4	6	7	7	6	7	6	7	7	7	7	6	7	6	6	6	6	6	6	5	2	2	1	1	2	陕西-西安-西咸新区
354	6	7	6	2	4	5	5	5	3	3	5	5	6	4	5	4	7	7	7	6	7	7	7	7	7	6	6	5	5	4	4	5	5	6	2	5	12	5	3	山东-烟台-莱阳市
355	6	6	6	2	7	7	6	7	2	3	2	7	2	2	2	7	5	6	5	5	5	6	6	6	6	6	6	6	6	6	3	3	3	3	2	4	6	2	2	福建-厦门-湖里区
358	7	7	6	1	2	1	4	3	2	3	6	7	5	3	2	6	7	7	7	6	7	6	5	3	7	5	6	4	6	4	1	3	3	6	2	5	6	5	3	广东-广州-天河区
359	5	5	4	2	3	4	4	5	1	1	6	6	5	6	5	6	7	7	7	7	6	7	7	7	7	5	5	5	5	6	6	6	6	7	2	4	11	4	2	山西-忻州-五台县
360	6	6	7	2	5	6	5	7	3	2	5	6	2	2	2	6	6	5	5	7	6	7	7	7	7	6	6	7	6	5	5	5	3	2	2	3	9	5	2	山西-太原-杏花岭区
361	7	7	7	1	5	5	5	5	5	5	6	6	7	3	2	5	6	6	6	6	6	7	7	7	7	7	6	7	7	7	1	2	1	3	1	4	11	6	2	山东-青岛-市北区
363	6	6	6	2	4	4	4	4	5	3	5	5	5	6	6	2	6	6	6	6	6	6	6	6	6	4	4	4	4	4	5	5	5	5	2	3	9	4	2	湖南-怀化-靖州苗族侗族自治县
364	6	6	6	2	6	6	5	5	2	2	6	6	2	2	2	6	5	2	3	5	5	7	7	7	7	6	6	7	6	6	6	5	5	5	2	4	8	5	2	天津-天津市-南开区
365	6	6	7	1	5	5	5	6	6	7	3	6	5	3	2	6	7	5	6	7	6	7	7	7	7	6	6	7	7	6	5	6	5	2	2	4	12	8	3	广东-深圳-南山区
366	4	4	4	5	2	1	2	1	3	3	6	6	2	3	3	5	7	7	7	7	7	6	7	7	7	5	5	5	6	2	2	2	1	1	1	4	6	4	2	山东-泰安-宁阳县
367	7	6	5	2	6	7	5	7	1	3	5	7	5	3	1	5	5	6	7	6	5	7	6	5	7	6	7	5	7	6	6	7	5	6	2	4	11	8	2	黑龙江-哈尔滨-道里区
368	7	7	7	1	7	7	7	7	2	3	7	7	1	2	2	7	5	5	5	5	6	7	7	7	7	7	7	7	7	7	7	7	7	7	2	3	7	7	2	广西-北海-海城区
369	7	7	7	1	7	7	7	7	3	3	6	6	2	2	1	6	6	6	6	6	6	7	7	7	7	7	7	7	7	7	2	2	2	1	1	4	11	7	2	新疆-哈密-伊州区
371	3	3	3	6	3	2	2	2	5	5	4	4	5	5	5	3	6	6	6	6	6	5	4	5	5	3	3	3	3	3	3	3	3	3	1	4	10	4	2	江苏-南京-六合区
373	7	7	7	1	6	6	5	5	3	4	6	5	3	3	3	6	5	4	5	5	5	7	7	7	7	6	6	7	6	7	6	6	6	6	1	3	10	7	2	四川-乐山-沙湾区
374	6	6	7	2	6	6	6	6	5	5	6	6	5	2	2	6	6	5	5	6	6	7	6	7	7	6	6	6	7	6	6	6	6	5	2	3	11	8	2	四川-成都-都江堰市
375	7	6	5	1	7	6	5	7	3	2	7	6	3	2	1	7	6	5	6	5	5	7	6	7	6	7	6	5	6	7	7	6	5	6	1	4	11	7	2	北京-北京市-西城区
376	5	5	6	1	3	3	2	3	5	5	3	5	6	5	5	5	7	6	7	7	6	6	7	6	6	6	6	6	7	6	2	2	1	1	2	6	9	4	2	内蒙古-呼伦贝尔-额尔古纳市
378	6	6	7	1	5	5	6	5	3	5	6	7	5	3	3	5	3	3	3	5	4	7	7	6	6	6	7	6	7	6	6	6	7	6	2	4	14	6	2	辽宁-大连-西岗区
379	5	5	6	2	3	3	4	2	5	6	3	2	6	5	4	3	7	6	6	7	7	6	7	7	6	3	3	2	3	2	5	6	6	5	2	4	8	6	2	山东-威海-环翠区
380	5	5	6	2	6	6	7	6	2	2	6	7	3	2	3	6	5	4	4	5	4	6	7	6	7	3	4	6	6	4	5	5	5	4	2	3	6	3	2	福建-福州-闽清县
381	7	7	6	1	7	6	7	7	1	2	7	6	2	1	2	7	6	7	6	7	6	7	7	7	7	6	7	7	6	7	6	7	6	6	2	4	9	8	1	上海-上海市-徐汇区
383	7	7	7	1	7	6	7	6	3	2	3	6	2	1	1	7	5	2	3	5	3	7	7	7	7	7	7	6	7	6	5	6	6	5	1	3	10	8	2	山东-临沂-平邑县
384	5	5	6	2	4	3	3	3	2	2	6	6	3	3	3	5	6	5	5	6	5	7	7	7	7	5	5	4	5	5	5	5	5	5	2	4	11	8	2	北京-北京市-石景山区
385	5	5	6	3	6	6	6	5	4	5	4	4	4	3	2	5	6	6	6	6	5	7	7	7	7	6	6	5	6	6	3	5	3	3	2	3	8	5	2	江西-赣州-瑞金市
386	6	6	7	2	7	6	6	7	2	3	6	7	3	2	1	6	6	6	7	6	7	7	7	6	7	6	7	6	7	5	6	5	6	6	2	4	11	6	2	江西-赣州-章贡区
387	6	6	6	2	6	6	6	6	2	3	6	6	2	3	1	6	6	6	6	7	6	6	7	6	7	6	7	6	7	6	6	5	6	5	2	4	7	5	3	江西-赣州-蓉江新区
388	7	6	6	2	6	6	7	7	2	3	6	7	2	1	1	6	5	4	4	4	4	7	7	7	7	6	6	6	6	7	6	5	4	3	1	4	11	5	2	河南-郑州-巩义市
389	7	7	6	1	7	7	5	7	6	5	2	4	6	4	3	7	7	6	6	6	5	7	7	7	7	7	7	7	7	7	6	6	5	6	2	4	4	5	2	河北-保定-满城区
390	6	6	7	2	3	3	4	3	6	6	2	4	7	6	5	4	5	5	6	5	5	6	6	5	5	6	5	6	5	5	4	4	5	3	1	4	11	6	1	天津-天津市-和平区
391	7	6	6	2	7	6	5	3	6	2	3	3	6	1	3	4	6	7	3	6	7	6	7	7	7	6	5	6	6	3	5	3	2	2	1	5	6	7	2	广西-南宁-马山县
392	6	7	6	2	6	5	6	5	3	1	5	7	3	2	1	7	5	4	2	2	5	6	7	7	6	6	7	5	7	5	3	1	2	3	2	4	8	5	2	河南-开封-尉氏县
393	5	6	7	4	6	6	6	5	5	4	5	4	3	3	5	6	6	6	6	7	5	6	6	7	7	6	6	6	7	5	2	3	6	3	1	2	1	1	2	湖北-武汉-汉南区
394	5	4	5	4	6	5	6	4	4	5	4	4	4	3	5	5	4	5	5	7	6	7	7	6	6	5	6	5	6	6	6	3	6	4	2	2	1	1	3	广西-南宁-高新技术产业开发区
395	7	7	6	1	6	6	7	6	3	3	6	6	3	2	2	7	4	3	3	3	3	7	7	6	7	6	6	7	7	6	6	7	6	6	1	2	11	7	2	湖南-长沙-浏阳市
396	6	6	7	2	6	7	7	6	6	5	4	5	6	5	3	6	6	4	4	5	5	7	7	7	7	6	6	5	5	6	6	6	7	5	2	4	14	7	2	江苏-南京-雨花台区
399	6	6	7	2	6	6	6	6	3	4	5	5	3	3	2	6	4	4	4	5	5	6	7	7	7	5	5	6	6	5	5	5	6	5	1	6	6	4	3	安徽-芜湖-繁昌区
400	6	6	6	2	4	4	4	4	2	2	6	6	3	4	1	6	7	7	7	6	7	5	5	5	5	5	5	6	6	4	1	3	2	1	1	2	1	1	2	广东-广州-番禺区
401	7	6	7	1	6	7	6	7	2	1	6	6	2	2	1	6	2	3	2	3	2	7	7	6	7	6	7	6	7	6	7	6	7	6	1	4	2	5	3	辽宁-沈阳-浑南新区
402	7	7	7	1	7	7	7	7	2	2	6	7	7	6	2	7	3	2	2	3	2	7	7	7	7	6	6	7	7	7	7	7	7	6	2	3	8	5	2	贵州-黔西南
403	7	6	7	1	6	6	6	6	2	2	7	7	2	1	2	7	5	5	5	5	5	7	7	7	7	7	6	7	7	7	6	6	6	6	2	2	1	1	2	河北-邢台-南宫市
405	7	7	7	1	7	7	7	7	2	3	6	6	4	3	2	5	6	6	6	6	6	6	6	6	6	7	7	7	7	7	5	5	5	5	1	2	1	1	2	山东-济南-历下区
406	6	6	5	4	5	4	6	4	6	6	3	3	6	5	4	4	6	3	3	3	6	7	7	7	7	4	4	5	5	4	4	5	5	4	1	2	1	1	2	福建-漳州-南靖县
407	6	7	6	1	6	6	6	6	3	3	6	6	3	2	2	6	4	4	3	3	4	7	7	7	7	6	6	6	6	6	6	6	6	4	2	4	11	6	2	山东-潍坊-高密市
410	3	3	5	1	2	4	4	3	5	5	3	4	2	5	3	5	7	3	6	7	6	7	7	7	7	6	7	7	5	5	3	5	3	1	1	2	1	1	2	河南-郑州-登封市
411	5	6	5	1	5	5	6	6	3	3	5	5	3	3	3	5	5	5	5	5	5	7	6	6	7	6	5	7	7	6	6	7	7	6	2	4	11	5	1	贵州-安顺-关岭布依族苗族自治县
412	5	5	6	2	5	6	6	6	4	5	4	5	5	5	6	6	6	4	4	5	6	5	6	6	6	6	6	6	6	5	6	6	6	7	1	3	2	6	2	辽宁-沈阳-沈北新区
413	5	4	6	3	4	4	3	2	4	4	5	4	5	4	6	3	6	5	6	5	6	5	6	4	6	5	6	6	5	7	5	3	4	6	2	5	2	5	2	山东-临沂-河东区
414	7	7	7	1	7	7	7	7	2	2	6	6	2	2	2	6	3	1	2	2	2	7	7	7	7	6	6	7	7	7	6	6	6	6	1	3	2	5	2	安徽-合肥-蜀山区
415	7	7	7	1	6	6	6	6	4	3	6	7	3	3	1	6	5	4	3	4	5	7	7	7	7	7	7	7	7	7	5	5	5	5	1	5	2	7	2	河北-邢台-隆尧县
416	7	7	7	1	6	6	6	7	3	3	6	6	3	2	1	6	5	5	5	6	6	7	7	7	7	7	7	7	7	6	6	5	5	6	2	4	8	6	2	广东-深圳-龙岗区
417	6	6	7	1	4	4	4	4	2	3	7	6	6	5	2	5	7	7	7	6	7	7	7	7	7	6	6	5	5	4	3	3	2	3	1	3	3	7	2	河南-郑州-中原区
418	6	6	6	2	6	5	6	6	4	5	6	6	6	6	2	4	5	5	5	5	5	7	7	7	7	7	7	5	6	6	5	6	6	6	1	2	1	2	2	重庆-重庆市-沙坪坝区
419	5	5	5	2	6	6	6	6	5	5	5	5	4	4	3	5	5	4	5	5	5	7	7	7	7	6	6	6	6	6	5	5	5	5	1	3	11	6	2	广东-广州-从化区
420	7	6	7	1	6	7	6	7	2	1	6	7	2	2	1	7	5	5	5	5	5	7	7	6	7	6	7	7	7	7	6	7	6	7	2	4	11	7	2	上海-上海市-虹口区
421	4	4	4	5	4	4	4	4	4	4	4	4	5	5	5	4	6	6	6	6	7	6	6	6	6	4	4	4	4	4	6	6	6	6	2	4	11	8	2	黑龙江-哈尔滨-平房区
422	7	7	7	1	6	5	5	6	3	2	5	6	3	3	3	6	5	6	7	7	6	7	7	7	7	6	6	6	7	6	3	5	3	5	1	5	11	6	3	广东-中山-沙溪镇
423	7	7	6	1	6	7	5	6	3	3	5	7	5	6	2	5	6	7	5	5	5	5	7	7	6	5	5	6	7	5	5	6	5	7	2	3	11	6	2	山东-菏泽-定陶区
424	6	6	6	2	5	5	4	5	3	4	5	5	4	4	4	5	7	7	7	7	7	7	7	7	7	6	6	7	6	5	5	5	5	4	2	3	8	6	1	河北-石家庄-赵县
426	6	7	6	1	5	5	6	6	3	3	2	6	3	2	3	6	5	5	5	6	6	7	7	7	6	6	6	7	5	6	6	5	6	5	1	3	11	7	2	辽宁-营口-盖州市
427	7	7	7	2	7	7	7	7	2	5	3	5	3	3	3	6	5	5	5	6	5	7	7	7	7	7	6	6	5	5	5	5	5	5	2	3	7	6	2	黑龙江-哈尔滨-方正县
428	5	6	6	2	7	6	6	5	5	5	3	3	5	3	2	5	6	5	5	5	5	7	7	7	7	7	7	6	6	6	6	5	5	5	1	5	6	5	3	浙江-宁波-鄞州区
429	7	6	6	1	5	5	6	6	6	3	5	6	6	2	3	5	6	5	6	7	5	7	7	7	7	5	6	7	5	6	5	5	6	7	2	3	11	5	2	湖南-湘西
430	6	7	5	2	5	6	6	6	3	2	6	6	3	2	3	5	4	3	3	4	4	7	7	7	7	5	6	7	7	7	5	5	6	5	2	3	14	5	2	海南-海口-秀英区
432	6	5	5	2	6	5	6	6	4	3	3	5	3	3	3	6	5	6	5	6	6	6	7	6	6	6	5	6	6	5	5	5	5	5	2	3	12	4	2	广西-南宁-江南区
433	5	5	5	3	6	5	5	5	5	3	5	5	5	3	3	5	7	7	7	7	7	7	7	7	7	5	5	5	5	6	5	5	5	5	1	4	11	5	2	山东-济宁-鱼台县
434	6	7	6	1	7	6	7	7	1	2	7	6	1	2	1	7	6	7	6	7	6	7	6	7	6	7	7	6	7	6	6	7	6	7	1	4	10	7	2	山东-济南-槐荫区
435	5	5	5	3	3	3	3	3	1	2	6	6	3	3	4	5	7	5	6	6	6	3	2	5	4	3	2	3	3	4	6	6	7	7	1	4	11	5	2	安徽-安庆-望江县
436	6	6	7	1	5	5	6	4	3	3	6	6	5	4	4	5	3	2	2	2	2	7	7	7	7	6	6	6	6	5	3	2	2	2	2	4	9	5	2	广东-广州-越秀区
437	6	6	6	2	6	6	7	4	6	5	5	5	6	7	5	2	6	6	6	6	6	7	7	6	7	6	6	6	6	4	3	2	2	2	1	5	6	5	2	四川-乐山-沐川县
438	6	6	6	2	3	4	4	3	2	2	6	6	3	2	2	6	5	4	5	5	5	7	7	6	7	5	5	7	6	6	5	5	5	6	2	4	9	5	2	湖南-长沙-宁乡市
440	6	7	6	2	5	5	4	5	2	3	3	6	5	5	2	4	6	5	6	5	6	7	7	7	7	6	5	6	6	5	7	6	6	5	2	2	6	2	2	湖南-衡阳-南岳区
441	5	4	5	2	5	5	4	4	4	3	5	5	5	4	5	4	5	4	5	5	4	7	7	6	6	5	4	4	4	5	5	5	4	5	2	3	9	5	2	四川-成都-温江区
443	7	7	7	1	7	7	7	6	1	1	7	6	3	3	2	6	5	4	5	5	4	7	6	6	6	7	6	6	6	6	6	6	7	7	2	5	12	8	2	河北-石家庄-赵县
444	7	7	6	1	7	6	7	6	7	3	7	7	2	2	1	7	7	6	6	3	5	7	6	7	7	7	7	6	7	7	7	6	7	6	1	4	11	7	2	辽宁-大连-西岗区
445	5	6	6	2	5	6	5	7	3	3	6	6	6	5	2	3	6	6	6	7	7	7	7	7	7	5	6	6	5	6	6	5	6	5	2	3	6	5	2	山东-潍坊-昌乐县
446	6	6	7	2	5	5	6	5	6	7	2	3	3	3	2	5	5	3	4	5	4	7	7	7	7	7	6	7	7	6	5	6	5	4	2	4	8	7	2	湖北-孝感-孝昌县
447	6	6	7	2	5	3	6	4	4	6	1	3	5	4	2	4	5	6	7	6	5	7	7	6	7	6	7	5	6	5	2	1	2	3	2	2	1	1	2	河北-廊坊-广阳区
448	6	7	6	1	7	6	7	7	4	4	2	7	7	6	1	5	5	5	5	5	4	5	6	6	6	6	7	7	6	6	6	4	5	4	1	3	3	3	3	福建-厦门-海沧区
449	7	7	7	1	4	4	4	4	1	1	7	7	5	3	7	4	7	5	7	7	6	7	7	7	7	7	7	6	5	4	2	2	2	3	2	4	6	4	3	上海-上海市-普陀区
450	7	7	6	1	6	6	7	7	4	3	6	6	3	1	1	6	3	3	3	5	2	7	7	7	6	6	7	7	7	6	6	6	7	6	2	4	5	6	2	江苏-南京-栖霞区
451	7	5	6	3	3	5	5	6	7	7	5	3	7	5	6	6	6	5	2	6	7	7	6	6	7	6	7	6	5	4	5	6	6	3	2	3	2	5	2	贵州-贵阳-云岩区
452	6	7	6	1	6	6	7	7	3	4	6	6	3	3	2	6	5	2	3	5	6	7	6	7	7	7	6	6	7	6	5	7	6	7	2	3	10	8	1	山东-青岛-崂山区
454	6	6	6	2	6	6	6	6	6	6	3	3	6	4	4	4	6	6	6	6	6	7	7	7	7	6	6	6	6	6	6	6	6	6	2	3	3	8	2	广西-南宁-经济技术开发区
455	6	6	6	2	6	6	6	6	6	5	2	6	6	2	2	6	6	6	6	6	6	7	7	7	7	6	6	6	6	6	6	6	6	6	1	3	3	3	2	福建-漳州-芗城区
456	7	6	6	2	6	6	6	5	3	2	5	5	3	3	4	5	5	4	5	5	4	7	7	7	7	6	6	6	7	4	2	2	1	2	1	4	3	5	2	河北-石家庄-新华区
459	6	5	6	2	5	5	5	5	3	3	5	5	4	4	3	5	6	6	5	5	5	7	7	7	7	5	5	5	6	5	6	6	6	5	2	4	9	6	2	安徽-合肥-肥东县
460	6	6	6	2	5	5	5	5	5	5	3	3	2	2	2	6	3	3	3	3	3	7	7	7	7	6	6	6	6	6	5	6	6	5	1	4	2	6	3	河北-石家庄-正定县
462	7	7	7	1	7	7	6	7	3	3	6	7	3	2	3	7	7	7	6	7	7	7	7	7	7	7	7	7	6	5	6	6	7	5	1	4	10	5	2	宁夏-银川-金凤区
463	7	7	6	1	7	6	6	7	1	2	7	6	2	1	1	6	6	5	5	6	7	7	6	6	7	6	6	7	7	6	5	5	6	5	1	4	14	8	1	广东-深圳-龙岗区
464	7	7	7	1	6	6	5	5	5	5	7	6	6	3	1	6	7	7	7	7	6	7	7	7	7	6	6	7	7	6	5	3	5	4	2	4	3	4	2	江苏-常州-天宁区
465	6	6	6	1	3	3	4	4	5	6	4	4	5	4	4	4	7	6	6	6	6	7	7	7	7	5	5	5	4	4	2	3	3	1	1	2	1	1	3	广东-广州-越秀区
466	5	5	5	2	6	6	6	6	5	5	4	5	6	6	4	4	6	6	7	7	6	6	6	6	6	6	6	6	5	6	3	3	3	3	2	2	3	3	3	广东-深圳-宝安区
468	7	6	6	1	5	6	5	5	1	1	7	7	3	3	1	7	2	2	2	3	3	7	7	7	7	7	7	6	6	5	3	4	3	2	1	2	14	2	2	江苏-南京-玄武区
469	6	7	6	2	6	7	6	6	3	3	5	6	2	2	1	6	7	6	5	6	6	7	7	6	7	5	6	6	5	7	5	6	5	5	1	4	8	6	2	浙江-舟山-普陀区
470	6	6	7	1	5	5	5	6	3	2	6	6	5	2	2	6	6	6	6	7	6	7	7	7	7	6	6	7	7	6	6	6	6	5	1	4	11	7	2	江苏-南京-江宁区
471	7	7	6	2	6	5	5	6	3	4	7	6	5	2	2	6	6	6	6	6	6	7	7	7	7	6	7	6	6	7	6	7	7	5	2	3	9	8	2	湖南-衡阳-雁峰区
472	6	6	6	2	6	6	6	6	3	3	5	6	4	3	2	6	3	3	3	3	4	7	7	7	7	6	6	6	6	6	6	5	5	5	2	4	11	5	2	北京-北京市-朝阳区
473	6	7	7	1	6	7	6	6	5	4	6	7	5	3	2	6	6	5	6	5	6	7	6	7	7	6	7	7	6	7	6	7	7	6	2	4	2	5	2	辽宁-抚顺-东洲区
474	6	6	6	1	5	5	5	6	2	2	6	6	5	5	4	4	5	4	5	5	4	7	7	6	7	5	5	7	6	5	3	5	4	5	2	2	9	7	1	北京-北京市-朝阳区
475	6	7	6	2	7	6	6	6	2	3	5	5	5	4	4	5	5	7	6	6	7	7	7	7	7	5	6	5	5	4	3	5	5	4	1	3	6	3	4	广西-梧州-长洲区
476	7	7	7	1	6	6	6	7	1	1	7	7	5	3	3	5	6	6	6	7	6	7	7	7	7	6	6	7	7	7	6	6	7	6	1	3	7	6	2	浙江-杭州-钱塘区
479	6	6	5	2	6	7	6	6	5	4	6	6	3	2	2	6	6	5	6	5	6	6	7	7	7	5	6	6	5	6	5	5	3	2	1	3	4	6	1	辽宁-盘锦-兴隆台区
480	5	5	5	3	4	5	4	5	4	5	4	4	5	5	4	4	6	5	6	6	5	7	7	6	7	5	5	6	6	5	5	6	6	6	2	4	3	4	2	四川-成都-新津县
481	5	6	7	1	7	6	5	7	5	5	1	6	7	3	2	6	7	5	6	5	6	7	6	7	5	6	7	5	6	7	6	5	7	5	2	3	11	5	2	江西-赣州-信丰县
482	6	5	5	2	7	7	6	5	2	1	5	6	4	2	1	5	7	6	7	5	6	7	7	7	7	5	6	5	6	5	6	4	2	1	2	2	1	1	2	云南-昆明-寻甸回族彝族自治县
483	5	5	6	2	5	4	5	5	3	3	6	5	5	3	3	5	6	5	5	6	5	7	6	6	7	6	6	7	6	6	5	5	5	5	1	5	11	8	1	北京-北京市-朝阳区
484	6	6	6	2	6	5	5	5	5	6	3	4	5	5	4	4	5	6	6	6	5	5	5	6	5	6	6	5	6	5	5	5	6	5	2	3	11	6	2	上海-上海市-奉贤区
485	6	6	6	3	7	6	7	6	5	3	5	6	5	2	3	5	6	6	5	6	5	6	6	5	7	6	6	6	6	6	6	7	6	6	1	3	10	8	2	江西-南昌-南昌县
486	6	7	7	1	6	7	6	7	6	7	3	5	6	5	3	6	7	4	5	6	3	7	7	6	7	7	6	5	7	5	6	3	5	3	2	3	8	5	2	湖南-长沙-岳麓区
487	5	5	5	2	6	6	7	5	3	3	6	6	5	3	3	6	7	6	6	6	6	7	7	7	7	5	6	5	4	4	6	6	5	5	2	3	9	5	2	江苏-淮安-清江浦区
488	4	5	5	2	2	2	2	2	6	6	2	3	6	6	5	3	7	7	7	7	7	4	4	4	4	5	5	4	4	3	2	1	1	2	1	5	10	5	2	湖南-长沙-天心区
489	5	5	5	4	6	4	4	5	6	5	5	5	6	7	5	5	6	5	5	5	6	7	7	6	7	6	6	6	6	5	5	5	4	5	1	4	4	7	1	湖北-武汉-青山区
490	6	6	7	2	6	5	6	6	3	3	6	6	5	2	3	6	5	4	5	5	5	7	6	7	6	5	6	6	7	6	6	5	6	5	2	2	6	7	2	福建-龙岩-连城县
492	5	7	6	1	7	6	7	6	1	2	7	6	2	3	2	7	2	2	2	5	1	7	6	7	6	6	7	6	5	7	6	7	5	6	2	3	10	5	2	山东-济南-平阴县
493	4	4	5	3	3	3	4	3	5	5	6	3	6	5	6	4	6	7	6	7	7	7	6	6	7	4	3	4	4	3	2	3	1	2	1	5	2	4	4	江苏-常州-武进区
494	5	5	5	3	6	7	6	6	7	6	5	6	6	5	4	6	7	7	7	7	7	7	7	7	7	6	6	7	7	6	6	5	5	6	2	3	15	1	2	陕西-延安-宝塔区
495	5	5	5	4	5	6	6	6	5	6	5	5	4	3	3	6	5	5	5	5	5	7	7	7	7	5	5	5	5	5	5	5	5	3	1	4	2	5	2	四川-眉山-丹棱县
496	4	4	4	2	4	5	5	5	5	5	3	3	5	4	4	4	5	5	6	5	5	5	5	5	5	5	5	4	4	4	2	2	2	2	1	6	2	2	3	陕西-商洛-丹凤县
498	6	6	7	1	6	7	6	6	2	1	6	6	2	1	3	6	5	2	5	6	6	7	7	7	7	7	7	6	6	5	4	5	3	2	2	2	14	5	2	上海-上海市-嘉定区
499	5	6	5	3	3	3	3	3	1	2	7	7	5	2	1	5	7	7	7	7	7	7	6	6	7	5	5	4	5	3	6	6	6	6	1	4	14	8	2	江西-南昌-青山湖区
500	6	7	6	2	6	6	7	7	3	3	6	6	3	2	1	6	5	4	5	5	5	7	7	7	7	6	7	6	5	6	5	5	6	5	2	3	9	4	2	河南-洛阳-伊川县
503	6	7	7	1	5	6	6	7	5	4	5	6	5	4	3	5	7	6	7	6	7	7	7	7	6	6	5	6	7	6	2	3	3	2	2	2	1	1	1	河南-郑州-高新技术产业开发区
504	6	5	4	2	5	4	6	4	7	5	6	3	6	5	5	3	5	4	3	4	4	5	3	4	3	2	4	4	2	4	3	4	3	2	2	2	1	1	2	贵州-安顺-西秀区
505	6	5	5	2	6	6	6	7	3	2	6	6	2	2	3	6	6	5	5	5	5	7	7	7	7	6	5	6	5	6	5	6	5	6	1	3	10	4	2	河南-郑州-高新技术产业开发区
506	6	6	7	2	5	5	6	5	3	3	6	6	5	3	2	6	5	3	5	6	3	6	7	7	6	6	7	7	6	7	6	6	5	5	2	4	8	5	2	辽宁-营口-盖州市
507	5	5	6	3	5	5	5	5	5	5	3	4	6	6	4	4	7	6	6	6	6	7	7	7	7	5	5	5	5	5	6	6	6	5	1	4	11	5	2	安徽-芜湖-镜湖区
508	6	6	7	3	4	5	5	4	2	3	3	6	3	3	3	5	6	6	5	6	5	6	6	6	6	5	5	5	6	4	6	5	6	5	2	3	14	7	2	山西-太原-杏花岭区
509	5	5	6	3	4	5	4	4	2	3	5	5	4	5	5	5	6	4	5	5	5	7	7	7	6	5	5	3	4	4	3	2	2	1	2	3	12	5	2	广西-南宁-马山县
510	5	5	6	1	6	6	6	6	2	4	5	5	5	3	2	6	6	6	6	5	6	5	7	5	7	5	5	7	5	6	7	5	6	6	2	4	6	3	2	辽宁-大连-瓦房店市
511	7	7	7	1	5	5	5	5	2	2	6	6	2	2	2	6	7	6	6	6	6	7	7	7	7	7	7	7	7	7	5	5	5	5	2	4	6	5	2	上海-上海市-浦东新区
512	7	7	7	2	6	6	6	6	5	4	4	4	5	4	3	6	5	3	4	5	5	7	7	7	7	7	7	7	7	7	6	6	6	6	2	4	2	6	2	北京-北京市-大兴区
514	6	4	4	4	6	7	7	6	2	2	6	6	2	2	2	6	7	7	7	6	6	7	7	7	7	3	3	4	4	4	2	2	2	1	2	2	6	4	2	四川-成都-武侯区
515	2	2	2	6	2	2	2	2	4	4	4	3	6	6	4	4	6	5	3	6	6	6	6	6	6	4	4	3	3	3	3	4	3	2	1	3	3	5	2	江苏-南京-雨花台区
516	7	6	6	1	7	6	5	6	3	3	5	6	3	3	2	5	5	2	3	5	3	6	7	6	7	6	7	6	7	5	7	5	6	5	1	3	11	8	2	江西-赣州-上犹县
517	7	7	7	1	7	7	7	7	4	4	4	5	4	4	3	4	6	6	5	7	6	7	7	7	7	7	7	7	7	6	2	2	2	2	1	6	11	5	2	广西-玉林-陆川县
518	7	6	6	1	6	5	6	7	5	3	7	6	7	6	2	6	5	4	5	6	3	7	6	6	7	6	7	7	5	6	6	7	5	6	2	4	11	8	2	云南-昆明-禄劝彝族苗族自治县
519	4	4	4	1	4	4	4	2	2	5	5	5	6	6	5	4	7	7	7	7	7	7	6	6	6	4	4	6	6	6	5	5	3	6	2	3	14	6	2	北京-北京市-丰台区
520	6	7	6	1	5	4	4	5	6	5	5	5	4	5	3	5	6	7	6	7	6	6	7	7	7	5	6	6	5	5	5	5	6	6	2	4	11	7	2	广东-汕头-潮阳区
521	5	6	6	3	5	5	5	5	2	1	6	7	3	2	2	7	5	4	3	5	6	7	7	7	7	5	5	6	7	6	5	6	6	3	2	2	14	6	2	重庆-重庆市-九龙坡区
522	7	6	7	2	6	6	6	7	5	3	6	6	3	3	2	6	7	6	6	7	6	7	7	7	6	6	6	6	6	7	3	6	5	7	2	6	14	3	2	河南-焦作-沁阳市
523	6	6	7	1	3	3	3	4	3	3	6	6	5	4	2	6	6	5	6	5	6	7	7	7	7	6	7	6	6	5	5	5	5	3	2	3	8	6	2	江苏-苏州-虎丘区
524	6	6	6	4	5	5	6	6	6	6	5	5	5	4	3	6	7	7	7	7	7	7	7	7	7	6	7	7	7	6	6	7	7	6	1	4	2	6	1	山东-潍坊-高新技术产业开发区
525	4	3	4	3	5	6	6	4	2	1	6	6	2	4	5	6	6	6	6	7	6	7	7	7	6	5	6	5	6	4	6	5	6	2	2	4	11	1	2	山西-太原-迎泽区
526	6	6	6	2	4	4	4	3	4	4	5	6	5	4	3	4	6	5	5	5	6	7	6	6	7	5	6	5	5	6	5	5	5	6	2	4	6	5	2	四川-内江-威远县
527	6	6	6	2	6	5	6	6	3	2	6	7	5	5	3	5	6	5	6	6	6	7	7	7	7	7	6	6	6	6	4	5	6	5	1	4	11	5	2	河北-秦皇岛-山海关区
529	4	4	4	4	4	4	4	4	4	4	4	4	4	4	4	4	4	4	4	4	4	4	4	4	4	4	4	4	4	4	4	4	4	4	1	6	11	5	3	江苏-苏州-虎丘区
530	6	6	6	2	6	6	6	6	2	2	6	6	5	2	2	6	5	5	5	5	5	7	7	7	7	6	6	6	6	7	6	6	6	6	2	4	3	4	2	河北-邢台-柏乡县
531	6	6	7	2	6	7	6	6	5	4	6	7	6	4	2	6	6	5	6	7	6	7	6	6	7	5	6	6	7	6	6	7	7	6	2	4	2	5	2	辽宁-抚顺-抚顺县
532	7	6	6	2	3	3	2	3	5	3	6	5	5	3	3	6	7	6	5	7	6	7	6	7	7	5	7	6	6	5	3	2	3	2	2	4	2	4	4	河南-漯河-召陵区
533	6	6	6	2	4	4	4	4	4	4	5	5	4	4	2	5	6	5	5	5	4	7	7	7	7	6	5	5	6	5	4	5	5	4	2	4	11	5	2	山西-晋城-城区
534	7	7	7	1	7	6	7	7	3	3	7	7	5	2	2	7	6	6	7	7	6	7	7	7	7	7	7	7	7	7	7	7	7	7	2	4	12	6	2	山西-大同-云州区
535	6	7	7	1	6	7	7	7	3	5	6	7	3	1	1	6	5	4	5	6	3	7	7	7	7	6	7	7	7	7	6	5	5	6	1	3	11	8	1	河南-濮阳-清丰县
536	6	7	6	1	5	7	6	7	2	1	6	7	2	1	2	6	5	5	5	5	5	6	7	6	7	6	6	6	7	5	6	6	7	6	2	4	8	6	2	上海-上海市-闵行区
537	6	6	7	2	6	7	6	6	1	1	6	7	2	5	2	3	6	6	5	5	3	7	6	7	6	6	6	6	7	6	6	6	7	6	2	4	11	8	2	广东-东莞-松山湖高新区
538	6	7	6	1	6	6	7	7	2	1	7	7	2	3	1	7	5	5	5	5	5	7	7	7	6	6	6	7	7	6	6	5	6	5	2	4	6	6	2	广东-江门-台山市
539	6	7	7	1	5	4	5	5	4	3	4	6	4	2	3	6	7	6	7	6	7	6	7	6	7	5	7	7	6	5	4	5	5	6	2	3	14	5	2	福建-泉州-丰泽区
540	7	7	7	2	5	5	6	5	5	5	5	2	5	5	5	5	6	5	6	6	5	7	7	7	7	5	5	6	6	6	5	6	5	6	2	3	6	4	3	湖南-岳阳-平江县
541	6	7	6	1	5	5	7	6	2	3	7	6	2	1	2	6	5	6	5	6	5	6	7	6	7	5	7	6	7	5	6	5	7	5	1	5	7	5	2	河北-秦皇岛-昌黎县
543	6	5	6	2	5	5	6	6	2	1	6	6	2	1	3	6	6	6	7	6	5	6	7	7	6	7	6	6	7	6	6	5	6	5	2	4	8	5	2	江西-赣州-石城县
546	6	6	6	2	4	4	5	5	3	2	7	6	6	5	2	3	7	5	7	7	6	7	7	7	7	5	6	7	6	6	3	3	3	2	1	2	1	1	1	四川-成都-成华区
547	7	7	6	1	7	6	6	6	1	2	7	6	5	1	1	7	5	5	5	5	5	7	7	7	7	7	6	7	6	7	6	6	7	5	2	3	10	3	3	河北-唐山-迁安市
548	5	6	6	4	7	5	6	7	4	3	5	6	5	5	4	5	5	5	6	6	7	7	7	6	7	7	6	6	7	7	4	4	5	5	2	5	12	4	2	吉林-长春-榆树市
550	5	6	7	3	5	6	7	6	4	5	6	7	5	5	3	6	5	6	5	7	6	7	7	6	7	6	7	6	7	6	5	6	5	5	2	4	6	3	3	四川-成都-天府新区
551	7	7	7	1	6	6	6	7	2	2	6	6	3	1	1	6	6	5	5	7	7	7	7	7	7	7	7	6	7	6	6	6	7	6	2	5	10	5	2	重庆-重庆市-荣昌区
552	6	7	7	1	4	4	4	4	5	5	4	4	6	7	4	4	7	5	5	5	5	7	7	7	7	5	6	4	4	5	4	5	3	1	2	2	3	2	3	广西-南宁-青秀区
553	4	5	6	3	6	7	5	5	5	5	6	5	7	3	4	6	7	7	6	6	5	7	6	6	7	5	4	5	7	6	6	7	6	7	2	2	3	1	4	河南-周口-川汇区
554	6	6	7	1	6	7	5	4	4	3	5	7	4	2	1	6	6	3	5	6	5	6	7	7	6	6	7	6	6	3	4	3	2	3	2	4	6	4	3	四川-成都-大邑县
555	7	7	7	1	6	6	6	7	5	5	5	4	6	5	4	3	6	4	6	6	5	7	7	7	7	5	5	6	6	5	6	6	7	4	1	3	10	6	2	广西-南宁-隆安县
556	5	5	7	3	7	6	6	5	5	6	4	5	4	5	5	5	6	5	5	6	5	5	5	6	5	5	4	6	5	5	6	5	5	6	2	3	10	3	2	重庆-重庆-黔江区
557	6	6	5	2	6	7	7	5	2	1	5	7	2	3	4	4	5	6	5	5	3	6	7	7	7	5	6	6	5	6	6	5	6	6	1	4	10	7	2	北京-北京市-丰台区
558	6	6	6	2	5	5	5	5	4	5	6	5	4	4	3	5	6	5	5	5	4	6	7	7	7	5	5	5	5	5	6	6	6	6	2	4	10	4	2	山东-济南-平阴县
559	6	5	5	2	6	7	6	5	2	1	6	7	3	3	2	6	5	5	5	6	6	7	7	7	6	4	5	5	5	6	6	7	7	5	2	2	10	6	2	上海-上海市-宝山区
561	5	6	6	2	5	5	6	3	3	2	3	5	5	5	4	5	6	6	7	7	5	6	6	7	7	5	6	5	5	6	3	2	3	1	2	3	9	5	2	北京-北京市-海淀区
562	4	4	3	5	3	3	3	2	5	5	4	4	5	4	4	3	5	5	5	6	6	5	6	6	6	3	3	4	4	4	4	3	3	3	2	4	6	4	3	四川-宜宾-兴文县
564	5	5	5	3	4	5	4	4	5	4	5	5	5	4	4	4	6	5	5	6	6	6	7	7	7	5	5	5	5	4	3	3	2	2	2	3	14	6	2	广东-深圳-福田区
565	6	5	7	1	5	6	6	7	2	3	6	7	2	3	1	5	3	4	3	4	2	7	7	7	6	6	7	5	6	4	5	6	7	6	2	3	14	3	2	辽宁-沈阳-和平区
567	7	7	6	1	6	7	7	7	3	2	6	7	1	2	1	6	5	5	6	6	7	6	7	7	7	6	7	7	7	4	4	5	5	4	2	2	5	5	2	河南-郑州-郑东新区
568	6	6	7	2	5	5	6	6	3	2	6	7	5	3	2	6	5	5	5	5	6	7	7	7	7	6	6	7	7	5	6	5	5	4	2	2	12	3	2	江西-宜春-上高县
570	6	6	6	3	4	4	4	4	5	5	4	4	5	6	5	4	7	7	7	7	7	7	7	7	7	5	5	5	5	6	3	2	1	2	2	2	6	3	2	湖南-株洲-石峰区
571	5	5	6	4	4	4	5	5	5	4	5	6	4	2	2	4	7	7	7	6	6	6	6	5	5	5	4	5	6	5	5	5	6	6	2	2	1	1	2	江苏-南京-玄武区
572	6	5	6	4	3	4	4	4	3	3	6	7	5	2	6	1	6	6	6	7	7	7	7	6	7	7	7	6	6	7	6	6	6	6	2	4	10	5	2	吉林-长春-宽城区
576	4	5	6	4	6	7	5	7	3	2	4	6	3	2	3	6	5	6	7	7	5	7	7	7	7	7	6	5	6	4	3	2	5	6	2	4	14	6	1	河南-信阳-固始县
578	5	5	5	1	4	4	4	4	1	1	6	6	1	1	1	7	6	6	6	6	6	7	7	7	7	7	7	7	7	7	7	7	7	7	1	4	5	3	2	湖北-武汉-洪山区
579	6	6	6	3	5	5	5	5	3	3	3	6	3	3	3	6	7	6	5	6	6	7	7	7	7	6	6	6	6	5	5	5	6	6	2	4	5	3	2	福建-福州-仓山区
580	7	7	7	1	6	6	7	7	2	1	6	6	5	2	2	7	7	6	7	7	7	7	7	7	7	6	7	7	7	5	5	5	6	5	1	4	10	7	2	湖北-襄阳-襄城区
581	4	5	5	2	3	3	5	4	3	2	5	6	5	5	6	4	7	6	6	6	6	7	7	7	6	4	4	5	6	4	2	2	3	1	2	3	12	3	2	山东-青岛-黄岛区
582	5	6	5	2	6	7	5	5	3	2	5	6	6	3	2	6	5	2	5	5	6	7	7	7	7	6	7	5	6	6	5	5	6	4	2	4	12	1	2	湖北-武汉-新洲区
583	6	7	6	2	6	6	7	6	5	3	6	6	5	4	2	6	5	5	6	6	5	7	7	7	7	5	6	6	7	6	6	5	6	5	1	2	1	1	2	安徽-合肥-长丰县
584	6	7	6	2	4	3	2	4	5	2	6	6	5	2	2	6	6	3	3	5	3	7	6	6	7	5	6	4	5	4	2	6	3	3	2	4	5	5	2	湖北-襄阳-襄城区
585	7	6	6	2	4	5	5	4	2	1	4	5	3	4	2	5	5	4	4	5	5	7	7	7	7	6	6	7	7	5	5	5	4	5	2	3	7	6	2	黑龙江-哈尔滨-道里区
586	6	7	6	2	6	6	6	7	2	1	6	7	5	3	1	6	6	7	6	7	6	7	7	6	7	6	6	6	7	6	5	6	5	6	2	3	6	5	2	山西-长治-屯留区
588	7	6	6	1	5	6	4	5	6	7	4	5	5	7	5	5	6	5	7	5	2	7	7	6	6	5	4	6	7	7	5	6	4	5	2	2	3	5	2	广东-广州-花都区
589	6	6	6	2	5	5	5	6	3	5	6	6	6	3	3	6	6	6	7	6	6	7	7	7	7	6	7	6	7	6	6	5	5	3	1	2	9	5	2	山东-德州-齐河县
590	2	2	2	7	4	4	4	4	6	6	4	4	6	4	5	4	5	6	6	5	6	7	7	7	7	4	4	4	4	4	2	4	2	2	1	3	9	2	3	广东-珠海-斗门区
591	4	4	5	4	3	2	3	2	1	2	6	6	5	3	5	6	6	6	6	6	7	7	7	7	7	6	6	7	6	4	6	6	6	6	2	4	9	2	3	湖北-黄冈-团风县
592	5	6	5	2	5	6	5	6	3	3	6	6	4	4	3	5	5	5	5	6	6	5	6	6	7	6	7	6	5	6	6	6	7	6	2	3	11	6	2	河北-秦皇岛-青龙满族自治县
593	6	7	5	3	6	4	5	6	4	5	3	5	6	4	3	5	6	5	6	7	5	6	7	6	5	5	6	7	5	4	3	2	3	5	1	3	11	2	1	山东-滨州-滨城区
594	6	6	6	2	6	6	6	6	2	2	6	6	6	4	2	5	6	6	6	6	6	6	6	6	6	6	6	6	6	6	5	5	5	5	2	4	3	6	2	浙江-杭州-上城区
596	5	6	6	2	4	4	4	4	2	6	3	4	4	2	4	5	6	7	5	5	6	7	7	7	7	5	4	5	5	4	6	5	6	4	2	4	9	1	3	江苏-无锡-锡山区
597	6	6	6	2	7	6	7	7	5	3	6	6	5	3	3	6	7	6	7	7	7	7	7	7	7	6	6	7	7	6	4	5	6	1	2	2	1	1	2	宁夏-吴忠-同心县
598	7	7	6	1	6	5	5	6	5	5	4	4	6	5	3	4	6	5	4	5	5	7	7	7	7	6	6	7	7	6	5	6	5	7	2	4	11	7	1	广东-广州-南沙区
599	6	6	7	1	3	3	3	3	5	5	6	6	5	2	2	6	6	6	7	6	7	7	7	7	7	6	6	7	7	6	6	5	6	5	2	4	11	6	2	江苏-南京-栖霞区
600	2	4	4	5	5	6	6	5	6	4	5	5	5	5	4	5	5	5	6	6	5	7	6	7	7	5	5	4	5	5	4	4	3	3	2	3	9	7	2	安徽-蚌埠-五河县
601	7	7	7	1	7	7	7	7	1	1	7	7	1	1	1	7	6	5	7	7	5	7	7	7	7	7	7	7	7	7	7	7	7	7	2	4	11	8	2	陕西-宝鸡-渭滨区
602	6	6	6	1	6	7	6	6	2	2	6	7	3	2	2	6	6	6	6	5	5	6	7	7	7	5	6	6	6	7	6	6	6	7	2	4	11	5	2	辽宁-丹东-元宝区
603	6	6	7	1	6	6	7	7	3	2	5	6	3	2	2	5	5	5	5	5	5	6	7	7	6	5	5	6	6	6	5	5	5	4	1	3	11	5	3	北京-北京市-东城区
604	7	7	7	1	6	5	5	5	5	5	3	4	5	4	4	4	6	5	6	7	6	7	7	7	7	6	6	6	7	6	5	5	6	6	2	3	9	6	2	广西-柳州-柳城县
605	7	6	6	3	3	3	3	4	2	2	6	6	5	3	5	5	6	5	5	5	5	7	6	6	7	3	3	5	5	4	2	3	3	2	2	2	6	4	3	上海-上海市-浦东新区
606	5	5	6	2	6	5	6	5	4	3	6	5	4	3	3	6	5	4	4	5	5	5	5	5	6	6	5	5	5	6	4	5	5	5	1	4	11	7	2	湖南-常德-临澧县
607	6	6	5	2	6	6	5	6	4	3	3	6	5	4	2	6	6	5	5	5	5	7	7	7	7	7	7	6	6	6	5	6	7	6	2	4	2	6	2	山东-淄博-高青县
608	5	4	4	2	4	5	3	3	5	4	5	6	6	4	4	5	7	6	5	6	7	6	7	6	6	4	5	6	4	3	5	4	5	2	2	3	11	5	2	江苏-苏州-相城区
610	7	7	7	1	4	4	4	3	1	1	7	7	6	4	2	7	7	7	7	7	7	7	7	7	7	7	7	7	7	7	7	7	7	7	1	4	10	8	2	甘肃-武威-民勤县
613	7	6	7	1	7	6	7	7	3	4	2	7	3	2	1	7	6	5	6	6	5	7	7	6	7	7	7	6	6	7	7	6	6	7	1	4	6	4	2	福建-福州-罗源县
614	6	6	6	2	6	6	6	5	5	5	4	6	5	3	3	6	6	5	5	6	5	7	7	7	6	6	7	7	6	6	5	4	5	3	1	5	7	6	2	江西-宜春-樟树市
615	6	6	5	2	5	6	6	7	6	5	4	4	4	4	3	4	6	4	3	5	4	7	7	7	7	5	6	6	6	4	4	5	5	3	1	4	11	5	2	山东-烟台-龙口市
616	7	7	7	1	5	5	6	4	4	4	6	6	4	4	4	4	7	4	5	5	5	7	7	7	7	7	7	4	6	4	2	2	3	1	1	2	1	1	2	吉林-四平-铁西区
617	6	7	6	2	5	6	5	6	5	4	6	5	4	2	4	5	6	1	3	5	3	7	7	7	7	5	6	6	7	7	4	3	2	2	1	2	10	5	2	江苏-淮安-盱眙县
618	6	6	7	2	6	6	6	6	3	3	6	6	3	2	2	6	5	4	4	4	4	7	7	7	7	6	7	7	6	6	5	6	6	6	2	4	2	5	2	山东-临沂-沂南县
619	7	7	7	2	4	4	4	3	5	5	4	5	4	5	4	4	5	5	5	6	5	6	6	6	7	5	5	6	6	5	4	5	4	3	1	6	2	5	4	山东-淄博-博山区
620	6	6	6	3	6	7	6	7	5	5	6	5	3	3	2	6	6	5	5	6	6	7	7	7	7	6	6	6	5	6	6	5	6	6	2	4	5	4	2	河北-石家庄-元氏县
621	6	6	5	3	3	2	4	3	5	6	3	2	5	5	2	4	7	7	6	6	6	7	7	7	7	5	5	6	5	4	5	3	6	6	1	3	10	5	1	上海-上海市-浦东新区
622	5	5	6	2	6	6	5	5	7	5	5	6	5	6	2	6	6	7	7	6	6	7	7	7	7	7	7	6	6	5	2	4	6	3	1	4	11	5	2	江苏-扬州-江都区
624	5	4	4	3	5	6	7	4	6	3	6	5	5	4	4	6	5	6	7	7	5	7	7	6	5	6	5	7	6	4	5	6	7	5	1	6	2	5	3	江西-赣州-石城县
625	7	7	6	2	6	7	6	7	5	3	3	6	5	5	2	6	5	6	6	5	6	7	7	6	7	6	6	7	7	7	5	6	7	5	1	6	8	5	2	内蒙古-乌兰察布-卓资县
626	7	7	7	1	7	7	7	7	1	1	7	7	1	1	1	7	7	7	7	7	7	7	7	7	7	7	7	7	7	7	7	7	7	7	1	2	15	5	2	广东-茂名-电白区
627	6	7	6	1	4	6	6	7	6	7	5	6	2	3	3	7	6	7	5	6	7	6	7	6	7	6	6	7	6	7	6	7	6	4	1	4	9	7	2	福建-龙岩-武平县
629	7	7	7	2	6	6	7	6	6	6	5	6	5	5	6	6	6	4	5	6	5	7	7	7	7	6	6	7	7	6	6	6	5	4	1	3	9	3	2	浙江-嘉兴-南湖区
630	7	6	7	1	7	7	7	6	2	1	6	7	2	4	2	4	5	4	5	5	4	7	7	7	6	5	7	7	6	7	5	4	5	5	1	3	11	6	2	湖北-荆州-沙市区
631	6	7	6	2	7	6	6	7	3	2	6	7	3	2	1	6	5	3	2	3	2	7	7	6	7	6	7	6	7	7	6	6	7	6	1	2	1	1	2	河南-信阳-商城县
632	5	6	6	2	5	5	5	5	4	4	5	5	4	4	3	6	5	4	5	5	5	6	6	6	6	6	6	6	6	6	5	5	5	5	1	4	9	6	2	广东-广州-黄埔区
635	7	7	7	2	6	6	7	7	3	3	5	5	3	2	1	5	5	3	3	5	5	7	7	7	7	6	6	5	6	6	5	4	5	3	2	4	9	4	2	江苏-南京-鼓楼区
636	7	7	6	1	5	6	6	6	3	3	5	6	3	3	1	6	6	5	5	5	5	7	7	6	6	5	5	5	6	6	6	6	6	4	1	3	11	6	3	广东-揭阳-榕城区
637	5	6	5	2	5	6	6	7	5	6	3	5	5	3	3	5	4	3	3	4	4	7	7	7	7	5	5	6	7	5	4	4	4	4	1	4	11	8	2	浙江-湖州-德清县
638	6	6	6	2	5	6	6	7	2	3	6	6	3	2	3	6	5	4	5	6	6	7	7	7	7	6	7	4	5	6	5	6	7	6	1	3	10	7	2	山东-菏泽-巨野县
640	6	6	6	2	6	6	7	7	4	5	5	6	6	6	7	7	6	5	6	6	6	7	7	7	7	6	6	7	7	5	6	5	5	6	1	3	10	6	2	河北-石家庄-桥西区
642	6	7	6	1	5	7	6	5	3	4	2	6	6	3	2	7	6	5	6	5	6	7	6	7	7	6	7	7	6	6	5	7	7	4	1	4	11	7	2	福建-龙岩-武平县
646	7	7	6	1	4	3	4	3	6	5	3	4	7	3	4	4	6	5	5	6	5	7	7	7	7	5	5	6	4	5	2	3	3	5	2	4	2	5	2	重庆-重庆市-北碚区
647	7	7	7	1	6	6	6	4	2	2	6	6	4	5	2	6	6	4	5	6	4	7	7	7	7	6	6	4	5	4	3	5	5	2	1	4	11	6	2	北京-北京市-朝阳区
648	5	5	5	3	4	4	4	4	3	3	6	6	5	5	3	5	6	6	6	6	6	7	7	7	7	5	5	4	5	5	5	5	5	5	1	3	6	5	2	安徽-黄山-休宁县
650	6	7	7	1	6	4	6	6	3	2	6	6	4	5	4	4	5	5	6	6	5	7	7	7	7	7	7	6	6	6	4	3	5	3	1	3	3	5	3	河北-廊坊-文安县
651	6	6	7	1	6	5	5	6	5	3	6	7	6	7	2	4	7	5	6	6	5	7	7	7	7	7	7	6	6	6	6	5	6	6	1	2	3	8	2	江西-宜春-奉新县
652	7	7	7	1	6	7	6	7	3	2	7	7	7	1	1	6	6	5	5	5	5	7	7	6	7	7	7	6	7	7	5	5	6	5	1	4	11	5	2	山东-济南-市中区
653	6	6	6	2	6	6	6	6	2	2	6	6	6	6	2	2	5	5	5	5	5	7	7	7	7	6	6	6	6	6	6	6	6	6	1	4	10	8	2	广西-防城港-防城区
654	7	7	7	1	7	7	7	7	3	2	6	7	2	2	1	7	7	6	7	7	6	7	7	7	7	7	7	7	7	7	5	5	5	4	1	4	11	5	2	天津-天津市-滨海新区
655	7	6	6	1	6	7	7	6	2	2	7	6	5	2	1	7	6	7	7	6	7	6	7	7	7	5	6	7	6	6	6	6	7	5	1	3	6	6	2	河南-郑州-巩义市
656	6	7	6	2	4	4	4	4	2	4	7	6	4	2	4	4	6	6	6	6	6	7	7	7	7	6	6	7	6	6	2	2	4	2	1	5	9	4	2	江苏-常州-天宁区
657	5	7	5	1	5	6	7	5	5	7	5	7	3	2	1	6	5	6	6	5	5	7	6	7	7	5	6	7	6	7	5	5	7	7	2	4	11	7	1	辽宁-鞍山-铁东区
658	4	4	3	5	3	3	3	3	5	4	4	4	5	4	5	5	6	6	6	6	6	7	7	7	7	5	5	5	5	5	3	3	3	4	1	3	6	2	2	广西-桂林-临桂区
659	5	7	5	2	4	3	3	2	3	3	3	6	3	5	4	4	7	5	6	6	7	6	7	7	6	6	5	6	7	5	4	4	3	2	2	3	7	5	2	北京-北京市-海淀区
660	6	6	6	1	6	6	7	7	2	2	6	6	4	3	2	6	2	3	3	2	1	7	7	7	7	6	6	7	7	7	1	1	2	2	2	3	4	7	2	云南-文山
661	6	6	7	2	5	4	4	5	3	2	6	6	5	4	3	5	4	4	3	3	3	7	7	7	7	6	7	6	6	6	6	6	7	6	1	4	11	5	2	江苏-南京-浦口区
662	5	5	6	3	4	4	4	5	5	6	4	6	5	4	4	4	6	7	6	6	7	7	7	7	7	4	5	4	4	4	5	6	6	6	1	3	7	8	2	河北-石家庄-赞皇县
664	4	4	4	3	6	6	6	7	6	7	5	4	5	6	4	5	6	7	6	7	7	7	7	7	7	5	5	6	6	4	2	1	1	5	1	2	10	2	2	贵州-贵阳-息烽县
665	6	7	7	1	5	5	5	7	4	3	5	5	3	2	2	6	5	4	5	5	4	6	7	7	7	6	6	7	5	4	5	6	5	5	1	4	11	8	2	山西-太原-清徐县
666	7	6	6	2	5	4	4	5	2	3	6	6	5	3	2	5	5	6	5	6	6	7	6	6	6	5	4	6	4	4	5	4	3	3	1	3	10	5	3	上海-上海市-浦东新区
667	4	4	5	3	4	4	3	3	4	5	5	4	5	5	4	5	4	5	7	6	5	7	7	7	7	5	5	5	5	4	4	5	5	4	1	5	3	6	2	辽宁-大连-金州区
668	7	7	7	1	5	5	6	5	5	5	3	6	5	2	1	5	5	5	5	7	5	7	7	7	7	7	7	7	7	6	6	6	6	7	1	4	11	8	2	江苏-苏州-常熟市
670	7	7	7	2	7	7	7	7	7	3	6	6	3	3	2	6	6	4	5	5	5	7	7	7	7	7	7	6	7	7	6	7	6	6	1	3	11	7	2	黑龙江-鹤岗-工农区
671	5	5	4	2	4	4	5	5	3	4	4	5	5	4	2	5	5	6	5	6	6	5	7	6	6	5	5	6	6	5	4	5	5	4	1	2	1	2	2	重庆-重庆市-永川区
672	6	6	6	2	4	5	5	4	2	2	6	5	4	4	2	5	5	4	3	3	4	6	7	7	7	6	6	7	6	5	5	6	4	6	1	3	11	5	3	广东-东莞-黄江镇
673	6	6	6	3	4	4	4	4	5	5	4	4	5	5	4	4	7	6	6	6	6	7	7	7	7	6	6	6	6	5	5	5	5	5	1	2	15	3	3	河南-濮阳-台前县
674	5	6	6	2	6	5	5	6	2	1	6	5	2	3	3	6	6	5	5	5	4	6	7	6	7	6	6	7	6	6	5	5	5	5	1	4	11	8	2	湖北-十堰-房县
675	7	7	6	1	6	6	7	6	5	2	6	7	2	2	1	7	6	5	5	6	6	7	7	7	7	6	6	7	6	7	5	5	6	7	1	4	11	7	2	广东-佛山-禅城区
676	7	6	6	1	6	6	7	6	1	2	6	7	2	1	2	7	6	6	6	7	5	7	7	7	7	7	6	6	7	7	6	7	6	6	1	3	7	8	2	北京-北京市-朝阳区
678	6	6	6	2	5	5	5	6	5	6	3	3	6	7	4	4	7	6	6	7	6	7	6	7	7	6	6	7	7	6	5	5	5	6	1	4	7	6	2	河南-新乡-延津县
679	5	3	4	3	3	3	2	2	2	2	5	6	6	4	5	5	6	5	5	6	5	6	6	7	6	5	5	2	3	4	5	3	5	3	1	2	12	1	2	云南-昆明-石林彝族自治县
680	7	7	6	2	6	6	5	6	3	3	4	6	3	3	4	5	7	7	6	6	7	7	7	7	7	6	7	6	6	6	6	5	6	5	1	2	1	3	2	湖北-鄂州-华容区
681	6	6	6	3	5	5	5	6	5	5	5	6	5	4	4	5	6	5	6	7	6	7	7	7	6	5	5	6	6	7	5	2	2	3	1	4	4	5	3	吉林-长春-农安县
682	5	6	6	2	5	5	5	5	5	5	5	6	5	3	3	6	6	6	5	6	6	7	7	7	7	6	6	7	6	6	5	6	5	5	1	3	11	6	2	湖南-长沙-湘江新区
684	6	6	6	2	6	5	5	6	5	5	6	6	5	3	2	6	6	5	6	6	6	7	7	7	7	6	6	6	6	6	5	5	5	4	1	3	3	6	2	浙江-温州-苍南县
685	6	6	6	2	6	6	7	7	3	3	6	6	5	5	3	6	6	6	5	5	6	7	7	7	7	6	6	6	6	6	5	5	6	5	1	4	14	5	2	广西-百色-右江区
687	5	6	7	3	5	4	6	7	4	5	7	6	4	4	3	5	7	5	6	5	6	7	7	7	6	5	6	7	7	5	4	5	6	7	1	4	8	4	4	黑龙江-大庆-萨尔图区
688	6	7	6	3	7	6	5	6	3	4	6	7	5	4	3	5	5	5	6	7	5	7	7	7	6	6	7	7	6	6	7	6	7	5	2	4	10	7	2	广东-东莞-莞城街道
689	6	7	6	1	5	6	5	5	5	5	4	5	4	5	3	5	6	6	7	6	7	7	7	6	7	6	6	7	5	4	2	3	2	5	1	4	10	4	3	河北-石家庄-井陉矿区
691	6	6	6	1	6	6	6	6	3	2	6	6	3	3	2	6	6	3	3	5	5	7	7	7	7	6	6	7	7	6	6	5	6	5	1	4	11	6	2	广东-梅州-丰顺县
692	6	6	6	1	6	6	6	6	3	2	6	6	3	3	3	6	6	3	3	5	5	7	7	7	7	6	6	7	7	6	6	5	6	5	1	4	10	6	2	北京-北京-西城区
693	5	5	4	4	3	5	4	3	3	3	5	3	2	3	4	3	3	5	4	3	4	6	7	7	6	3	6	3	3	4	4	5	3	5	2	3	3	6	2	陕西-西安-莲湖区
694	6	6	7	1	4	4	5	5	1	2	7	7	5	6	5	3	7	7	7	7	7	7	7	7	7	5	5	4	4	5	2	2	2	1	2	3	7	5	3	广东-深圳-坪山区
695	4	5	5	3	3	3	4	5	3	3	6	5	3	3	3	5	6	4	5	5	4	7	7	7	7	5	5	5	6	6	5	6	6	4	2	2	1	1	2	河南-开封-尉氏县
696	6	7	7	2	6	6	7	7	4	4	6	6	5	4	4	5	7	7	7	7	6	7	7	6	7	4	5	6	6	6	2	3	3	2	2	2	6	3	2	贵州-黔西南
697	5	6	5	2	4	5	5	6	3	3	5	6	3	5	6	4	7	6	7	6	7	7	7	6	7	7	6	6	7	5	3	3	2	5	2	4	6	5	2	山东-济南-莱芜区
698	7	6	7	2	5	6	4	7	3	2	6	7	3	2	3	5	6	6	7	7	6	7	7	7	6	5	5	7	6	7	6	5	7	6	2	5	6	4	4	广东-东莞-长安镇
700	6	6	6	2	5	3	5	4	6	5	4	6	6	6	4	5	6	4	5	6	6	7	7	7	7	6	6	6	6	4	6	6	6	6	2	3	9	6	2	黑龙江-绥化-北林区
701	5	6	6	3	5	6	6	6	6	5	4	3	5	3	3	5	6	6	6	7	6	7	7	7	7	6	6	5	6	6	6	5	5	6	2	4	2	3	3	河北-邯郸-邯山区
702	5	5	6	2	6	5	5	4	3	3	5	5	3	4	5	5	7	6	5	5	5	7	6	7	7	4	4	6	7	4	4	4	5	4	2	3	7	4	2	宁夏-中卫-沙坡头区
703	7	7	7	1	7	7	7	7	1	5	1	7	3	3	1	7	7	7	7	7	7	7	7	7	7	7	7	7	7	7	7	7	7	7	2	4	11	8	1	江西-南昌-东湖区
704	7	7	7	1	5	5	5	5	2	2	6	7	2	1	1	7	5	5	6	6	5	7	7	7	7	6	6	7	7	7	6	6	6	5	1	3	11	4	2	浙江-宁波-奉化区
705	4	4	4	4	5	4	5	5	5	3	5	5	5	4	4	4	6	6	5	6	5	7	7	7	7	4	4	4	4	5	3	3	2	2	2	3	8	4	2	山东-德州-陵城区
707	6	6	6	2	4	4	4	4	5	5	4	7	5	5	4	5	6	6	6	6	6	7	7	6	6	6	6	6	7	5	5	5	5	5	1	4	10	5	2	江苏-盐城-亭湖区
709	6	5	6	1	4	5	4	3	5	5	6	5	5	2	3	5	5	4	4	4	3	6	7	7	7	6	5	5	7	6	7	6	5	4	2	3	10	5	2	四川-成都-温江区
710	6	6	6	2	6	6	7	6	4	5	6	3	3	2	2	6	5	4	5	6	5	7	7	7	6	6	7	6	6	6	6	7	7	6	2	4	8	7	2	广东-汕尾-城区
711	6	6	5	3	5	6	5	5	4	5	4	3	5	4	3	5	7	7	7	7	6	7	7	7	7	5	6	6	7	5	3	4	3	3	2	2	12	5	2	江西-南昌-南昌县
712	4	4	5	3	4	4	3	3	5	6	5	2	6	4	4	4	7	6	7	6	6	7	7	6	6	5	5	5	6	5	2	3	3	6	2	5	6	4	4	广东-广州-花都区
713	7	7	7	1	7	7	7	7	2	2	7	7	3	3	2	7	5	2	2	2	2	7	7	7	7	7	7	7	7	7	4	3	3	3	1	4	3	5	3	河南-郑州-经济技术开发区
714	6	7	6	2	5	6	6	6	4	2	6	6	4	4	2	6	5	6	6	5	6	5	6	5	7	6	6	6	7	6	6	5	5	6	2	3	7	5	2	河北-秦皇岛-山海关区
715	6	6	7	1	4	4	4	5	2	2	6	6	4	3	3	5	6	6	6	7	7	7	7	7	7	7	7	7	6	6	5	5	5	4	1	3	11	6	2	江苏-扬州-江都区
716	5	5	5	3	4	4	4	5	3	3	5	5	5	5	3	5	6	6	6	6	6	5	6	6	6	5	5	5	5	5	3	3	3	3	2	4	11	6	2	北京-北京市-房山区
717	6	6	7	1	5	6	7	4	3	1	6	7	2	2	1	6	6	5	6	7	5	6	7	6	7	6	7	6	7	6	3	4	3	3	2	4	9	4	2	辽宁-沈阳-于洪区
718	7	7	6	1	6	5	6	7	3	4	6	7	4	2	1	6	6	4	5	5	6	7	7	6	6	6	7	5	6	7	5	6	7	5	2	3	9	4	2	山西-忻州-保德县
719	7	6	7	1	6	7	6	5	3	3	7	6	3	2	1	6	5	5	6	5	6	7	7	6	6	5	6	7	6	7	5	5	6	5	1	4	11	5	2	辽宁-本溪-南芬区
720	7	6	6	2	5	6	6	7	2	3	6	5	5	3	3	5	6	5	5	6	5	7	7	7	6	6	5	7	7	6	5	5	6	6	2	6	12	5	2	黑龙江-哈尔滨-巴彦县
721	5	6	5	2	4	4	5	4	5	5	4	6	6	7	5	4	6	6	6	6	6	7	7	7	7	6	6	6	5	4	3	3	2	5	2	2	1	2	2	河北-邯郸市-磁县
722	7	6	6	2	6	5	6	7	3	2	6	6	6	2	2	6	7	6	7	7	6	7	7	7	6	6	5	7	7	6	7	6	5	3	2	3	11	4	1	河北-保定-徐水区
723	6	6	6	2	4	4	4	4	4	5	4	4	6	4	4	4	7	7	7	7	6	7	7	7	7	6	6	6	6	5	6	6	6	6	2	6	11	8	2	北京-北京市-东城区
724	7	7	6	2	4	4	5	4	5	7	1	3	7	5	5	2	7	6	6	5	7	6	6	5	7	5	5	7	6	6	3	1	3	3	2	3	11	7	2	浙江-杭州-淳安县
725	7	7	7	1	4	5	5	5	2	1	6	7	5	4	2	5	5	5	5	5	5	6	5	6	6	6	5	7	6	5	5	6	6	5	1	5	11	8	2	浙江-绍兴-诸暨市
726	6	5	7	1	7	5	5	6	5	2	7	6	5	2	5	6	6	6	7	7	6	7	7	7	7	7	6	7	6	3	6	5	3	2	1	2	1	1	2	甘肃-兰州-安宁区
727	6	7	6	1	5	6	5	6	2	3	6	7	3	3	2	6	3	2	3	3	3	7	7	7	6	6	6	7	7	6	5	6	6	5	2	3	11	8	2	北京-北京-海淀区
728	6	7	6	2	6	7	6	6	2	1	6	7	2	1	2	7	6	6	6	7	6	7	7	6	6	6	6	7	6	7	6	6	6	5	1	3	11	6	2	江西-赣州-于都县
