# Supplementary material
Source: Research Square preprint supplement (doi:10.21203/rs.3.rs-9704769/v1)
Supplement: Supplementary file 3 [file e52618bcb6b7d994679df122.docx]

**Interview Guide**

**Purpose:**

To capture individuals’ experiences and perceptions on e-CNY usage, including their willingness to use e-CNY, the factors influencing usage, and how these factors shape their intention to use.

**Participants:**

Interviewees were recruited through convenience sampling via social network.

**Materials/Support:**

Prior to the interviews, participants were shown a roughly two-minute introductory video about e-CNY.

**Instructions for Interviewer:**

- Before starting the interview, check participants’ willingness to use e-CNY.
- Use simple, clear language.
- Allow enough time for responses.
- Remind participants they can pause or skip questions at any time.
- Avoid talking about researchers’ personal experiences or insights about e-CNY.

**Introduction/Recall Prompt:**

Have you heard about e-CNY, the digital form of the Chinese yuan (Renminbi) issued by the People’s Bank of China? (Show the e-CNY introductory video) We are interested in learning about your views on e-CNY or your experiences with it, if you have used e-CNY before. You can answer in your own words, take your time, and you can skip any question you don’t want to answer.

**Interview Questions:**

1. Have you ever heard about e-CNY before? If so, from which sources did you obtain related information?
2. Have you ever used e-CNY? If yes, when did you start using it, and approximately how many times have you used it?
3. After watching the video, how would you describe e-CNY in your own words?
4. What was your initial feeling when you first learned about e-CNY?
5. Are you willing to use e-CNY? Please explain why or why not.
6. What are the main advantages and disadvantages of e-CNY?
7. How do you think e-CNY could be improved? If these improvements were made, would you be more willing to use it?
8. (For participants unwilling to use e-CNY) Would you consider using e-CNY in the future? Why or why not?
9. (For participants who have used e-CNY) Do you plan to continue using e-CNY in the future? Please explain your reasons.

**Closing:**

- Is there anything else you want to tell me about e-CNY? You can say anything that comes to your mind.
- Thank you so much for your time!
